# Phylogenies of extant species are consistent with an infinite array of diversification histories

Stilianos Louca<sup>1,2,\*</sup> & Matthew W. Pennell<sup>3,4,\*</sup>

<sup>1</sup>*Department of Biology, University of Oregon, USA*

<sup>2</sup>*Institute of Ecology and Evolution, University of Oregon, USA*

<sup>3</sup>*Biodiversity Research Centre, University of British Columbia, Vancouver, Canada*

<sup>4</sup>*Department of Zoology, University of British Columbia, Vancouver, Canada*

\*Correspondence should be addressed to both authors: [www.loucalab.com](http://www.loucalab.com) and [pennell@zoology.ubc.ca](mailto:pennell@zoology.ubc.ca)

## Abstract

Time-calibrated molecular phylogenies of extant species ("extant timetrees") are widely used for estimating the dynamics of diversification rates (1–6) and testing for associations between these rates and environmental factors (5, 7) or species traits (8). However, there has been considerable debate surrounding the reliability of these inferences in the absence of fossil data (9–13), and to date this critical question remains unresolved. Here we mathematically clarify the precise information that can be extracted from extant timetrees under the generalized birth-death model, which underlies the majority of existing estimation methods. We prove that for a given extant timetree and a candidate diversification scenario, there exists an infinite number of alternative diversification scenarios that are equally likely to have generated a given tree. These "congruent" scenarios cannot possibly be distinguished using extant timetrees alone, even in the presence of infinite data. Importantly, congruent diversification scenarios can exhibit markedly different and yet plausible diversification dynamics, suggesting that many previous studies may have over-interpreted phylogenetic evidence. We show that sets of congruent models can be uniquely described using composite variables, which contain all available information about past dynamics of diversification (14); this suggests an alternative paradigm for learning about the past from extant timetrees.

**Keywords:** speciation; extinction; macroevolution; phylogenetic trees; pulled speciation rate

## 17 Introduction

18 A central challenge in evolutionary biology is to explain why some taxonomic groups and some time periods  
19 have so many species while others have so few; ultimately this means estimating and explaining variation  
20 in rates of speciation and extinction (13). Estimating these rates is crucial to investigating fundamental  
21 questions such as the role of biotic and abiotic processes in shaping patterns of species richness (7), how  
22 Earth's biota recover after mass extinction events (15, 16) and whether there are general dynamics that govern  
23 how biodiversity accumulates (17). Measuring such rates has taken on a new urgency as we try to understand  
24 how anthropogenically induced extinctions compare to "background" rates (18, 19). In the medical domain,  
25 "speciation" and extinction rates are key parameters that provide insights into the historical dynamics and  
26 future trajectories of viral epidemics (20, 21).

27 Unfortunately, the vast majority of lineages that have ever lived have not left any trace in the fossil  
28 record, and hence we are forced to attempt to reconstruct their diversification dynamics from incomplete  
29 data. Indeed, for many groups the fossil record is so incomplete that the primary source of information on  
30 past diversification dynamics comes from time-calibrated molecular phylogenies of extant lineages ("extant  
31 timetrees"). There is now an abundance of increasingly sophisticated methods for extracting this information,  
32 with most state-of-the-art methods fitting variants of a birth-death process (22) to extant timetrees (1–6, 23).  
33 These methods have, collectively, been used in thousands of studies and have substantially contributed to  
34 our understanding of the drivers of diversity through time. Despite their popularity, there has been a long-  
35 lingering doubt about many of these inferences. For one, simulation studies have repeatedly shown that some  
36 variables, especially extinction rates, are generally difficult to estimate (11, 24–28). But an even more funda-  
37 mental issue, which has particularly drawn the attention of paleobiologists, is that there may not be sufficient  
38 information in a molecular phylogeny to fully reconstruct historical changes in diversification rates. For ex-  
39 ample, when speciation and extinction rates vary through time — and there is abundant evidence from the  
40 fossil record that they do (13) — mass extinction events can erode much of the signal of preceding diversifi-  
41 cation dynamics (9, 10, 12), and may themselves even be confused with stagnating speciation rates (29). To  
42 date these critical identifiability issues remain poorly understood, and no general theory exists for describ-  
43 ing which diversification scenarios can be distinguished from each other and precisely what information on  
44 diversification rates is in principle extractable from extant phylogenies.

45 Here, we present a solution to this problem: We develop a mathematical framework for assessing  
46 the identifiability of the general stochastic birth-death process with homogeneous rates, where speciation  
47 ("birth") rates ( $\lambda$ ) and extinction ("death") rates ( $\mu$ ) can vary over time, and which underlies the majority of  
48 existing methods for reconstructing diversification dynamics from phylogenies (5). By considering the full  
49 space of possible diversification scenarios (i.e., with arbitrary  $\lambda$  and  $\mu$ ), rather than special cases (as has been  
50 done so far), we reveal a fundamental and surprisingly general property of the birth-death process that has far  
51 reaching implications for diversification analyses. Specifically, we show that for any given birth-death model  
52 there exists an infinite number of alternative birth-death models that can explain any given extant timetree  
53 equally well as the candidate model. This ambiguity persists for arbitrarily large trees and cannot be resolved  
54 even with an infinite amount of data using any statistical method. Crucially, these alternative models may  
55 appear to be similarly plausible and yet exhibit markedly different features, such as different trends through  
56 time in both  $\lambda$  and  $\mu$ . Using simulated and real timetrees as examples, we demonstrate how failing to rec-  
57 ognize this immense ambiguity may seriously mislead our inferences about past diversification dynamics,  
58 shedding doubt on conclusions from countless previous studies. We further show that these sets of "congru-  
59 ent" models can be uniquely identified based on suitably defined composite variables: the "pulled speciation  
60 rate", corresponding to the effective  $\lambda$  in the hypothetical absence of extinction and under complete species  
61 sampling, or equivalently, the "pulled diversification rate", corresponding to the effective net diversification

62 rate in the hypothetical case where  $\lambda$  is time-independent. Based on either one of these variables, it becomes  
63 possible to determine whether different diversification scenarios are at all distinguishable, to explore the full  
64 range of plausible scenarios that are consistent with the data, and to make inferences about diversification  
65 dynamics without knowing  $\lambda$  and  $\mu$  themselves.

## 66 **Computing the likelihood of diversification models from lineages-through-time curves**

67 One of the most important features of extant timetrees is the lineages-through-time curve (LTT), which counts  
68 the number of lineages at each time in the past that are represented by at least one extant descending species  
69 in the tree. The LTT provides a simple visual overview of a tree’s branching density over time and impor-  
70 tantly, contains all the information encoded in the tree regarding speciation and extinction rates (30) (see also  
71 Supplement S.1.2). This is because the likelihood of a extant timetree under a given birth-death model with  
72 homogeneous rates depends solely on the tree’s LTT, but not on any other properties of the tree that do not  
73 affect the LTT.

74 Here we show that an elegant analogous relationship also exists between the likelihood of a tree and  
75 the LTT that would be predicted by a given birth-death model. Any given speciation and extinction rates over  
76 time,  $\lambda$  and  $\mu$ , and the probability that an extant species will be included in the tree  $\rho$  (present-day “sampling  
77 fraction”), can be used to define a “deterministic” diversification process, where the number of lineages  
78 through time no longer varies stochastically but according to a set of differential equations (3, 31–33; also  
79 see Supplement S.1). The LTT predicted by these differential equations (“deterministic LTT”, or dLTT) is a  
80 mere theoretical property of the model that resembles the LTT of a tree only if the tree is sufficiently large for  
81 stochastic effects to become negligible, and assuming the model is an adequate description of the process that  
82 generated the tree. It can be shown, however, that the likelihood of a tree under a given birth-death model can  
83 be written purely in terms of the tree’s LTT and the model’s dLTT (Supplement S.1.2). This means that any  
84 two models with the same dLTT (conditioned on the number of extant species sampled,  $M_o$ ) yield identical  
85 likelihoods for the tree. In the following, we shall therefore call any two models “congruent” if they have  
86 the same dLTT for any given  $M_o$ . Note that two models are either congruent or non-congruent regardless  
87 of the particular tree considered, meaning that model congruency is a property of models and not the data  
88 (Supplement S.1). Furthermore, the probability distribution of tree sizes generated by a birth-death model,  
89 when conditioned on the age of the stem (or crown), is identical among congruent models (Supplement S.1.7).  
90 Hence, congruent models have equal probabilities of generating any given timetree and LTT, analogous to  
91 how congruent geometric objects exhibit similar geometric properties (discussion in Supplement S.1.8). In  
92 the absence of further information or constraints, congruent models cannot possibly be distinguished solely  
93 based on extant timetrees, neither through the likelihood nor any other test statistic (such as the  $\gamma$  statistic  
94 (34)). Note that whether or not a given phylogenetic data set is sufficient to statistically distinguish between  
95 non-congruent models is an entirely different matter.

## 96 **Congruent model sets are infinitely large and infinite-dimensional**

97 The above considerations lead to an important question: For any birth-death model (i.e., with given  $\lambda$  and  $\mu$   
98 as functions of time, and a given sampling fraction  $\rho$ ), how many alternative congruent models are there and  
99 how could one possibly construct them? To answer this question, we first present an alternative method for  
100 recognizing congruent models. Given a number of sampled species  $M_o$ , a model’s dLTT is fully determined  
101 by its relative slope,  $\lambda_p = -M^{-1}dM/d\tau$  (where  $M$  is the dLTT and  $\tau$  is time before present or “age”). It  
102 can be shown that  $\lambda_p$  is related to the model’s speciation rate as  $\lambda_p = P\lambda$ , where  $P(\tau)$  is the probability  
103 that any lineage that existed at age  $\tau$  survives to the present and is included in the timetree (Supplement

104 S.1.1). In the absence of extinction ( $\mu = 0$ ) and under complete species sampling ( $\rho = 1$ ),  $\lambda_p$  is identical  
105 to  $\lambda$ , however in the presence of extinction  $\lambda_p$  is pulled downwards relative to  $\lambda$  at older ages, while under  
106 incomplete sampling  $\lambda_p$  is pulled downwards relative to  $\lambda$  near the present. We thus henceforth refer to  $\lambda_p$  as  
107 the “pulled speciation rate” of a model. Since a model’s dLTT is fully determined by  $\lambda_p$  and, reciprocally,  $\lambda_p$   
108 is fully determined by the dLTT, it becomes evident that two models are congruent if and only if they have the  
109 same pulled speciation rate. The latter can also be used to calculate a variable called “pulled diversification  
110 rate” (14), defined as:

$$r_p = \lambda - \mu + \frac{1}{\lambda} \frac{d\lambda}{d\tau}. \quad (1)$$

111 The  $r_p$  is equal to the net diversification rate ( $r = \lambda - \mu$ ) whenever  $\lambda$  is constant in time ( $d\lambda/d\tau = 0$ ), but  
112 differs from  $r$  when  $\lambda$  varies with time. As shown in Supplement S.1.1,  $\lambda_p$  and  $r_p$  are linked through the  
113 following differential equation:

$$\frac{d\lambda_p}{d\tau} = \lambda_p \cdot (r_p - \lambda_p), \quad (2)$$

114 with initial condition  $\lambda_p(0) = \rho\lambda_o$  (where  $\lambda_o = \lambda(0)$  is the present-day speciation rate). Equation (2)  
115 reveals that  $r_p$  is completely determined by  $\lambda_p$  (one can just solve for  $r_p$ ). Reciprocally,  $\lambda_p$  is completely  
116 determined by  $r_p$  and some initial condition (i.e.,  $\lambda_p$  specified at some fixed time), since one can just solve  
117 the differential equation for  $\lambda_p$  (see solution in Supplement S.1.6). We thus conclude that two birth-death  
118 models are congruent if, and only if, they have the same  $r_p$  and the same  $\lambda_p$  at some time point (for example  
119 the same product  $\rho\lambda_o$ ).

120 We are now ready to assess the breadth of congruent model sets. Consider a birth-death model with  
121 speciation rate  $\lambda > 0$ , extinction rate  $\mu \geq 0$  and sampling fraction  $\rho \in (0, 1]$ . If we denote  $\eta_o = \rho\lambda_o$ , then  
122 for any alternative chosen extinction rate function  $\mu^* \geq 0$ , and any alternative assumed sampling fraction  
123  $\rho^* \in (0, 1]$ , there exists a speciation rate function  $\lambda^* > 0$  such that the alternative model ( $\lambda^*, \mu^*, \rho^*$ ) is  
124 congruent to the original model. In other words, regardless of the chosen  $\mu^*$  and  $\rho^*$ , we can find a hypothetical  
125  $\lambda^*$  that satisfies:

$$\lambda^* - \mu^* + \frac{1}{\lambda^*} \frac{d\lambda^*}{d\tau} = r_p, \quad \rho^* \lambda^*(0) = \eta_o. \quad (3)$$

126 Indeed, to construct such a  $\lambda^*$  one merely needs to solve the following differential equation:

$$\frac{d\lambda^*}{d\tau} = \lambda^* \cdot (r_p - \lambda^* + \mu^*), \quad (4)$$

127 with initial condition  $\lambda^*(0) = \eta_o/\rho^*$  (solution given in Supplement S.1.4). The above observation implies  
128 that, starting from virtually any birth-death model, we can generate an infinite number of alternative congru-  
129 ent models simply by modifying the extinction rate  $\mu$  and/or the assumed sampling fraction  $\rho$ . Alternatively,  
130 congruent models can be generated by assuming various ratios of extinction over speciation rates,  $\varepsilon = \mu/\lambda$   
131 (formula in Supplement S.1.5). This set of congruent models — henceforth “congruence class” — is thus  
132 infinitely large. The congruence class can have an arbitrary number of dimensions (depending on restrictions  
133 imposed a priori on  $\lambda^*$  and  $\mu^*$ ), since  $\mu^*$  could depend on an arbitrarily high number of free parameters.

134 For illustration, consider the simulations in Figure 1, showing four markedly distinct and yet congruent  
135 birth-death models. The first scenario exhibits a constant  $\lambda$  and a temporary spike in  $\mu$  (mass extinction  
136 event), the second scenario instead exhibits a constant  $\mu$  and a temporary drop in  $\lambda$  (temporary stasis of  
137 speciations) around the same time, the third scenario exhibits a mass extinction event at a completely different  
138 time and a fluctuating  $\lambda$ , while the fourth scenario exhibits an exponentially decaying  $\mu$  and a fluctuating  $\lambda$ .  
139 These congruent scenarios were obtained simply by assuming alternative extinction rates, and a myriad of  
140 other congruent scenarios also exist. Analogous situations can be readily found in the literature. Figures  
141 2A–C, for example, show a birth-death model with exponentially varying speciation and extinction rates,

142  $\lambda = \lambda_o e^{\alpha\tau}$  and  $\mu = \mu_o e^{\beta\tau}$  (where  $\lambda_o$ ,  $\mu_o$ ,  $\alpha$  and  $\beta$  are fitted parameters), as commonly considered in other  
143 studies (3, 35), fitted to a massive timetree of 79,874 extant seed plant species via maximum likelihood.  
144 Simply by modifying the coefficient  $\beta$  and choosing  $\lambda$  according to Eq. (4), one can obtain an infinite number  
145 of congruent and similarly complex scenarios, with even opposite trends over time (Fig. 2B). Similarly,  
146 Figs. 2D–F show origination and extinction rates of marine animal genera estimated from fossil data (36),  
147 compared to two congruent scenarios, one where the linear trend of  $\mu$  has been reversed (Fig. 2B) and one  
148 where  $\mu$  was set to zero (Fig. 2C).

149 Such ambiguities were described previously in special cases. For example, Kubo and Iwasa (31)  
150 recognized that a variable  $\lambda$  and constant  $\mu$  can be exchanged for a constant  $\lambda$  and a variable  $\mu$  to produce  
151 the same dLTT; similarly Stadler (29) and Crisp *et al.* (37) observed that simulations of mass extinctions  
152 produced similar LTTs as simulations of temporarily stagnating diversification processes. Other previous  
153 work on constant-rate birth-death models revealed that alternative combinations of time-independent  $\lambda$ ,  $\mu$   
154 and  $\rho$  can yield the same likelihood for a tree (38–41). By generalizing these analyses to the time-variable  
155 case, we have revealed that in fact vast expanses of model space are practically indistinguishable.

## 156 **Model congruency compromises existing reconstruction methods**

157 Since the likelihood of an extant timetree can be expressed purely in terms of  $r_p$  and the product  $\rho\lambda_o$  (Sup-  
158 plement S.1.6), or alternatively purely in terms of  $\lambda_p$  (Supplement S.1.3), extant timetrees only provide  
159 information about the congruence class of a generating process and not the actual speciation and extinction  
160 rates. This identifiability issue can be interpreted as follows: Since all information available on past diversi-  
161 fication dynamics (representable by birth-death models, to be precise) is encoded in a single curve, namely  
162 the LTT, one should not expect to be able to “extract” from it two independent curves ( $\lambda$  and  $\mu$ ) without  
163 additional information, as this would essentially double the amount of information at hand.

164 In order to estimate  $\lambda$  and  $\mu$ , previous phylogenetic studies have been imposing strong and largely  
165 arbitrary constraints. For example, many studies assume that  $\lambda$  or  $\mu$  vary exponentially through time (42).  
166 However this specific functional form is rarely justified biologically, and alternative functional forms of com-  
167 parable simplicity and shape (e.g., the logistic function, or the Gauss error function) can be envisioned. Nor-  
168 mally one expects that, regardless of which of these functional forms is considered, with sufficient data fitting  
169 any of these forms will lead to qualitatively similar trends and shapes. This expectation simply does not hold  
170 in our case, because the best-fitting representative within any given model set will generally only be the one  
171 closest to the congruence class of the true process, rather than closest to the true process itself (Fig. 3). Con-  
172 sequently, fitting alternative functional forms (i.e., alternative model sets) can result in drastically different  
173 inferences with alternative trends in  $\lambda$  and  $\mu$  over time, even if the each functional form used is in principle  
174 adequate for approximating the true historical  $\lambda$  and  $\mu$  (examples in Supplement S.6 and Supplemental Fig.  
175 S5). This conclusion applies to virtually any model set, including birth-death shift models where  $\lambda$  and  $\mu$   
176 change at discrete time points (43).

177 We stress that common model selection methods based on parsimony or “Occam’s razor”, such as  
178 the Akaike Information Criterion (AIC; 44) and the Bayesian Information Criterion (BIC; 45) that penalize  
179 excessive parameters, generally cannot resolve this issue for multiple reasons. First, these information criteria  
180 were designed to minimize the error of future model-based predictions by avoiding overfitting to finite data,  
181 and not to identify the actual process that generated the data — these are very different scientific goals with  
182 well-known trade-offs. There is no reason to believe that the simplest scenario in a congruence class will be  
183 the one closest to the truth. Indeed, even if the true model is included in a congruence class, it will almost  
184 always be the case that there are both simpler and more complex scenarios within the same congruence class

185 (e.g., Figs. 2D–F) and, crucially, all of these alternative models remain equally likely even with infinitely  
186 large datasets. Second, if one were to apply AIC or BIC, it is unclear how to quantify the complexity of  
187 a diversification scenario in comparison with alternative scenarios, which may be described using different  
188 functional forms. It is tempting to think that one could simply count the number of parameters. However, any  
189 given curve can be written using various alternative functional forms parameterized in distinct ways (recall  
190 that ultimately we wish to approximately estimate the curves  $\lambda$  and  $\mu$ , not the parameters of some functional  
191 form); the number of parameters is a property of parameterized sets of curves, not of a single curve. Even  
192 if that were not the case, the number of parameters conventionally associated with a given functional form  
193 need not necessarily reflect our intuition about complexity: Is a linear extinction rate ( $\mu = \alpha + \beta \cdot \tau$ , two  
194 parameters) more or less complex than an exponentially decaying rate ( $\mu = \alpha e^{\beta\tau}$ ) or an oscillating rate of the  
195 form  $\mu = \alpha \sin^2(\beta\tau)$ ? In addition, different members of a congruence class may be described with different  
196 functional forms involving the same number of parameters. For example, the diversification scenario with  
197 linear extinction rate ( $\mu = \alpha + \beta \cdot \tau$ ) and constant speciation rate ( $\lambda = \gamma$ ) (3 parameters, assuming complete  
198 species sampling) is congruent to an alternative and markedly different scenario with zero extinction rate  
199 ( $\mu^* = 0$ ) and  $\lambda^*$  defined as the solution to the differential equation  $d\lambda^*/d\tau = \lambda^* \cdot (\gamma - \alpha - \beta\tau - \lambda)$  with  
200 initial condition  $\lambda^*(0) = \gamma$  (again 3 parameters); there is no reason to prefer one congruent scenario over  
201 the other based on the number of parameters or biological realism. Third, even when fitting models of the  
202 same functional form, as explained above the maximum-likelihood model will a priori tend to be the one  
203 closest to the congruence class of the true process, rather than the true process itself, and neither AIC nor  
204 BIC would resolve this (since all other allowed models would have the same number of parameters but lower  
205 likelihood). Supplemental Fig. S6 shows examples where maximum-likelihood fitted models, chosen among  
206 a wide range of model complexities based on AIC, grossly fail to estimate the true rates even when fitting to a  
207 massive tree with 1,000,000 tips, despite the fact that the models could in principle have accurately captured  
208 the true rates.

209 Previous studies have not recognized the breadth of this issue because they typically only consider  
210 a limited set of candidate models at a time, both when analyzing real datasets as well as when assessing  
211 parameter identifiability via simulations; as a result, previous studies have been (un)lucky enough to not  
212 compare two models in the same congruence class (see Supplements S.2 and S.3 for reasoning). For example,  
213 if a tree was generated by an exponentially decaying  $\lambda$  and  $\mu$  (e.g., via simulations), then fitting an exponential  
214 functional form will of course yield accurate estimates of the exponents; however if the generating process  
215 was only approximately exponential and better described by another gradually decaying function, then fitting  
216 an exponential curve could even lead to opposite trends (examples in Fig. 2 and Supplement S.6).

217 It is important to realize that congruent scenarios can have markedly different macroevolutionary im-  
218 plications. For example, Steeman *et al.* (46) reconstructed past speciation rates of Cetaceans (whales, dol-  
219 phins, and porpoises) based on an extant timetree and using maximum-likelihood (assuming  $\mu = 0$ ). Steeman  
220 *et al.* (46) found a temporary increase of  $\lambda$  during the late Miocene-early Pliocene (Fig. 4), suggesting a po-  
221 tential link between Cetacean radiations and concurrent paleoceanographic changes. However, alternatively  
222 to assuming  $\mu = 0$ , one could assume that  $\mu$  was close to  $\lambda$ , consistent with common observations from  
223 the fossil record (13). For example, by setting  $\mu = 0.9 \cdot \lambda$  one obtains a congruent scenario in which  $\lambda$  no  
224 longer peaks during the late Miocene-early Pliocene but instead exhibits a gradual slowdown throughout most  
225 of Cetacean evolution (Fig. 4B). Both scenarios are similarly complex and both could have generated the  
226 timetree at equal probabilities. Even the common methodological decision to estimating net diversification  
227 ( $r = \lambda - \mu$ ) rather than  $\lambda$  and  $\mu$  separately (8, 11), is no longer meaningful in light of our results; the shape  
228 of  $r$  is not conserved across a congruence class. Likewise, the models in a congruence class will not share  
229 “average” (however defined) rates; hence absolute rate estimates (1), which have been used to estimate broad  
230 macroevolutionary patterns (17) and background rates of extinction (19), are also unlikely to be accurately  
231 reconstructed. These issues are likely also present in more complex models with additional free parameters,

232 for example where some clades exhibit distinct diversification regimes (42, 47). In such situations, the tree  
233 can always be decomposed into a set of sub-trees with distinct LTT curves, each of which is subject to the  
234 same identifiability issues as described here. Our findings thus shed doubts over a lot of previous work on  
235 diversification dynamics, including some of the conclusions from our own work (14, 17).

## 236 Ways forward

237 Our findings for birth-death models of diversification are closely analogous to classic results from coalescent  
238 theory in population genetics (48, 49), where an infinite number of models can give rise to the same drift  
239 process as the idealized Wright-Fisher model. This realization was profoundly important for the field; it fo-  
240 cused researchers' attention on the dynamics of the effective population size  $N_e$ , a composite but identifiable  
241 parameter that is the same for all models with the same Wright-Fisher drift process, rather than on the actual  
242 (but non-identifiable) historical demography, sex ratios etc. of the population. Consequently, the field has  
243 adapted and developed a plethora of tools to infer changes in  $N_e$  through time and across the genome. Here  
244 we have found an analogous generality, and have confirmed previous suspicions that many historical diversifi-  
245 cation scenarios may not be distinguishable using extant phylogenies alone (10, 13, 30, 31). We have shown  
246 that such congruent scenarios can be defined in terms of the  $\lambda_p$ , or equivalently, in terms of the  $r_p$  and  $\rho\lambda_o$ ,  
247 all of which are identifiable provided sufficient data (indeed, for sufficiently large trees these variables can  
248 be directly calculated from the slope and curvature of the LTT; 14). Each congruence class contains exactly  
249 one model with  $\mu = 0$  and  $\rho = 1$ , which is also the only model where  $\lambda = \lambda_p$ ; hence the pulled speciation  
250 rate can be interpreted as the effective speciation rate generating the congruence class's dLTT in the absence  
251 of extinctions and under complete species sampling. Similarly, each congruence class contains an infinite  
252 number of models with time-independent  $\lambda$ , and for these models  $r_p = r$ ; hence the pulled diversification  
253 rate can be interpreted as the effective net diversification rate if  $\lambda$  was time-independent. It is in this way that  
254  $\lambda_p$  and  $r_p$ , being identifiable and "effective" rates in idealized scenarios, are analogous to  $N_e$  in population  
255 genetics.

256 Of course fossil data could in principle help resolve the issues highlighted here, for example via  
257 fossilized-birth-death models (50, 51) or birth-death-chronospecies models (52), however for a large number  
258 of taxa (e.g., all prokaryotes and many soft-bodied eukaryotes) fossil data are virtually non-existent. Rather  
259 than attempting to estimate  $\lambda$  and  $\mu$ , one can instead estimate  $\lambda_p$ ,  $r_p$  and  $\rho\lambda_o$  (and  $\lambda_o$  if  $\rho$  is known) either  
260 using likelihood methods (Supplement S.5) or based on the slope and curvature of a tree's LTT (14). Our  
261 previous work (14) has shown that  $r_p$  itself can yield valuable insight into diversification dynamics and can  
262 be useful for testing alternative hypotheses (also see Supplement S.4). Using simulations, for example, we  
263 found that sudden rate transitions, for example due to mass extinction events, usually lead to detectable fluc-  
264 tuations in  $r_p$ ; therefore, a relatively constant  $r_p$  over time would be indicative of constant — or only slowly  
265 changing — speciation and extinction rates (14). One can also obtain other useful composite variables from  
266  $\lambda_p$ ,  $r_p$  and  $\rho\lambda_o$ . For example, in cases where  $\rho$  is known one can obtain the "pulled extinction rate", defined  
267 as  $\mu_p := \lambda_o - r_p$  (14). Note that  $\mu_p(\tau)$  is equal to the extinction rate  $\mu(\tau)$  if  $\lambda$  has been constant from  $\tau$   
268 to the present, but differs from  $\mu$  in most other cases. The present-day  $\mu_p$  is related to the present-day  $\mu$  as  
269 follows:

$$\mu_p(0) = \mu(0) - \frac{1}{\lambda_o} \frac{d\lambda}{d\tau} \Big|_{\tau=0}. \quad (5)$$

270 Hence if the present-day speciation rate changes only slowly, the present-day  $\mu_p$  will resemble the present-  
271 day  $\mu$ . Further, since  $\mu(0)$  is non-negative, we can obtain the following one-sided bound for the rate at which  
272  $\lambda$  changes at present:

$$\frac{1}{\lambda_o} \frac{d\lambda}{d\tau} \Big|_{\tau=0} \geq -\mu_p(0). \quad (6)$$

273 If a macroevolutionary question is only concerned with recent speciation events (7) then one can test hy-  
274 potheses using  $\lambda_o$ , which can be readily identified if  $\rho$  is known.

## 275 **Conclusions**

276 We have shown that for virtually any candidate birth-death process, suspected of having generated some ex-  
277 tant timetree, there exists an infinite number of alternative and markedly different birth-death processes that  
278 could have generated the timetree with the same likelihood. Without further information or prior constraints  
279 on plausible diversification scenarios, extant timetrees alone cannot be used to reliably infer speciation rates  
280 (except at present-day), extinction rates or net diversification rates, raising serious doubts over a multitude of  
281 previous estimates of past diversification dynamics. Our work could thus explain why frequently diversifi-  
282 cation dynamics observed in the fossil record are in great disagreement with phylogenetics-based inferences  
283 (3, 5, 10, 13, 46).

284 On a more positive note, we resolved a long-standing debate and precisely clarified what information  
285 can indeed be extracted from extant timetrees alone — namely  $\lambda_p$ ,  $r_p$ , the product  $\rho\lambda_o$  (and  $\lambda_o$  if  $\rho$  is known),  
286 and any other variables that can be expressed in terms of  $\lambda_p$ ,  $r_p$  and  $\rho\lambda_o$ . These identifiable variables not  
287 only tell us when two models are in principle distinguishable but they can themselves yield valuable insight  
288 into past diversification dynamics. We see these as analogous to the concept of effective population size  
289 in population genetics — we cannot uniquely determine the exact sequence of events that led to current  
290 diversity, but by blending out some of the historical details we could potentially gain powerful and robust  
291 insights into general macroevolutionary phenomena.



## 292 **Code availability**

293 Computational methods used for this article, including functions for simulating birth-death models, for con-  
294 structing models within a given congruence class, for calculating the likelihood of a congruence class, and  
295 for directly fitting congruence classes (either in terms of  $\lambda_p$  or in terms of  $r_p$  and  $\rho\lambda_o$ ) to extant timetrees  
296 (Supplement S.5), are implemented in the R package `castor` (53).

## 297 **Acknowledgments**

298 S.L. was supported by a startup grant by the University of Oregon, USA. M.W.P. was supported by an NSERC  
299 Discovery Grant. We thank L. Harmon, S. Otto, A. MacPherson, D. Schluter, T.J. Davies, M. Whitlock, L.F.  
300 Henao Diaz, K. Kaur, J. Uyeda, D. Caetano, J. Rolland, L. Parfrey, and A. Mooers for insightful comments  
301 on this work.

## 302 **Author contributions**

303 Both authors conceived the project and contributed to the writing of the manuscript. S.L. performed the  
304 mathematical calculations and computational analyses.

## 305 **Competing financial interests**

306 The authors declare that they have no competing interests.

## 307 **Materials & Correspondence**

308 Correspondence and requests for materials should be addressed to both authors.

## 309 **References**

- 310 [1] Magallon, S. & Sanderson, M. J. Absolute diversification rates in angiosperm clades. *Evolution* **55**,  
311 1762–1780 (2001).
- 312 [2] Rabosky, D. L. Likelihood methods for detecting temporal shifts in diversification rates. *Evolution* **60**,  
313 1152–1164 (2006).
- 314 [3] Morlon, H., Parsons, T. L. & Plotkin, J. B. Reconciling molecular phylogenies with the fossil record.  
315 *Proceedings of the National Academy of Sciences* **108**, 16327–16332 (2011).
- 316 [4] Stadler, T. Recovering speciation and extinction dynamics based on phylogenies. *Journal of evolution-*  
317 *ary biology* **26**, 1203–1219 (2013).
- 318 [5] Morlon, H. Phylogenetic approaches for studying diversification. *Ecology Letters* **17**, 508–525 (2014).
- 319 [6] Rabosky, D. L. *et al.* Bamm tools: an r package for the analysis of evolutionary dynamics on phyloge-  
320 netic trees. *Methods in Ecology and Evolution* **5**, 701–707 (2014).

- 321 [7] Schluter, D. & Pennell, M. W. Speciation gradients and the distribution of biodiversity. *Nature* **546**, 48  
322 (2017).
- 323 [8] Maddison, W. P., Midford, P. E., Otto, S. P. & Oakley, T. Estimating a binary character's effect on  
324 speciation and extinction. *Systematic Biology* **56**, 701–710 (2007).
- 325 [9] Quental, T. B. & Marshall, C. R. Extinction during evolutionary radiations: reconciling the fossil record  
326 with molecular phylogenies. *Evolution* **63**, 3158–3167 (2009).
- 327 [10] Quental, T. B. & Marshall, C. R. Diversity dynamics: molecular phylogenies need the fossil record.  
328 *Trends in Ecology & Evolution* **25**, 434–441 (2010).
- 329 [11] Rabosky, D. L. Extinction rates should not be estimated from molecular phylogenies. *Evolution* **64**,  
330 1816–1824 (2010).
- 331 [12] Liow, L. H., Quental, T. B. & Marshall, C. R. When can decreasing diversification rates be detected  
332 with molecular phylogenies and the fossil record? *Systematic Biology* **59**, 646–659 (2010).
- 333 [13] Marshall, C. R. Five palaeobiological laws needed to understand the evolution of the living biota.  
334 *Nature Ecology & Evolution* **1**, 165 (2017).
- 335 [14] Louca, S. *et al.* Bacterial diversification through geological time. *Nature Ecology & Evolution* **2**,  
336 1458–1467 (2018).
- 337 [15] Jablonski, D. Mass extinctions and macroevolution. *Paleobiology* **31**, 192–210 (2005).
- 338 [16] Meredith, R. W. *et al.* Impacts of the Cretaceous terrestrial revolution and KPg extinction on mammal  
339 diversification. *Science* **334**, 521–524 (2011).
- 340 [17] Henao Diaz, L. F., Harmon, L. J., Sugawara, M. T. C., Miller, E. T. & Pennell, M. W. Macroevolutionary  
341 diversification rates show time dependency. *Proceedings of the National Academy of Sciences* **116**, 7403  
342 (2019).
- 343 [18] Pimm, S. L. *et al.* The biodiversity of species and their rates of extinction, distribution, and protection.  
344 *Science* **344**, 1246752 (2014).
- 345 [19] De Vos, J. M., Joppa, L. N., Gittleman, J. L., Stephens, P. R. & Pimm, S. L. Estimating the normal  
346 background rate of species extinction. *Conservation Biology* **29**, 452–462 (2015).
- 347 [20] Stadler, T., Kühnert, D., Bonhoeffer, S. & Drummond, A. J. Birth–death skyline plot reveals temporal  
348 changes of epidemic spread in hiv and hepatitis c virus (hcv). *Proceedings of the National Academy of  
349 Sciences* **110**, 228–233 (2013).
- 350 [21] Arora, N. *et al.* Origin of modern syphilis and emergence of a pandemic treponema pallidum cluster.  
351 *Nature microbiology* **2**, 16245 (2017).
- 352 [22] Kendall, D. G. *et al.* On the generalized “birth-and-death” process. *The annals of mathematical statistics*  
353 **19**, 1–15 (1948).
- 354 [23] Maliet, O., Hartig, F. & Morlon, H. A model with many small shifts for estimating species-specific  
355 diversification rates. *Nature Ecology & Evolution* (2019).
- 356 [24] FitzJohn, R. G., Maddison, W. P. & Otto, S. P. Estimating trait-dependent speciation and extinction  
357 rates from incompletely resolved phylogenies. *Systematic Biology* **58**, 595–611 (2009).

- 358 [25] Davis, M. P., Midford, P. E. & Maddison, W. Exploring power and parameter estimation of the bisse  
359 method for analyzing species diversification. *BMC Evolutionary Biology* **13**, 38 (2013).
- 360 [26] Beaulieu, J. M. & O’Meara, B. C. Extinction can be estimated from moderately sized molecular phy-  
361 logenies. *Evolution* **69**, 1036–1043 (2015).
- 362 [27] Rabosky, D. L. Challenges in the estimation of extinction from molecular phylogenies: a response to  
363 beaulieu and o’meara. *Evolution* **70**, 218–228 (2016).
- 364 [28] Moore, B. R., Höhna, S., May, M. R., Rannala, B. & Huelsenbeck, J. P. Critically evaluating the theory  
365 and performance of bayesian analysis of macroevolutionary mixtures. *Proceedings of the National  
366 Academy of Sciences* **113**, 9569–9574 (2016).
- 367 [29] Stadler, T. Simulating trees with a fixed number of extant species. *Systematic Biology* **60**, 676–684  
368 (2011).
- 369 [30] Nee, S., May, R. M. & Harvey, P. H. The reconstructed evolutionary process. *Philosophical Transac-  
370 tions of the Royal Society of London B: Biological Sciences* **344**, 305–311 (1994).
- 371 [31] Kubo, T. & Iwasa, Y. Inferring the rates of branching and extinction from molecular phylogenies.  
372 *Evolution* **49**, 694–704 (1995).
- 373 [32] Harvey, P. H., May, R. M. & Nee, S. Phylogenies without fossils. *Evolution* **48**, 523–529 (1994).
- 374 [33] Billaud, O., Moen, D., Parsons, T. & Morlon, H. Estimating diversity through time using molecular  
375 phylogenies: Old and species-poor frog families are the remnants of a diverse past. *Systematic Biology*  
376 (2019).
- 377 [34] Pybus, O. G. & Harvey, P. H. Testing macro–evolutionary models using incomplete molecular phy-  
378 logenies. *Proceedings of the Royal Society of London. Series B: Biological Sciences* **267**, 2267–2272  
379 (2000).
- 380 [35] Hallinan, N. The generalized time variable reconstructed birth-death process. *Journal of theoretical  
381 biology* **300**, 265–276 (2012).
- 382 [36] Alroy, J. Dynamics of origination and extinction in the marine fossil record. *Proceedings of the National  
383 Academy of Sciences* **105**, 11536–11542 (2008).
- 384 [37] Crisp, M. D. & Cook, L. G. Explosive radiation or cryptic mass extinction? interpreting signatures in  
385 molecular phylogenies. *Evolution* **63**, 2257–2265 (2009).
- 386 [38] Stadler, T. On incomplete sampling under birth–death models and connections to the sampling-based  
387 coalescent. *Journal of Theoretical Biology* **261**, 58–66 (2009).
- 388 [39] Morlon, H., Potts, M. D. & Plotkin, J. B. Inferring the dynamics of diversification: A coalescent  
389 approach. *PLOS Biology* **8**, e1000493 (2010).
- 390 [40] Stadler, T. How can we improve accuracy of macroevolutionary rate estimates? *Systematic Biology* **62**,  
391 321–329 (2013).
- 392 [41] Stadler, T. & Steel, M. Swapping birth and death: Symmetries and transformations in phylodynamic  
393 models. *Systematic Biology* **68**, 852–858 (2019).

- 394 [42] Rabosky, D. L. Automatic detection of key innovations, rate shifts, and diversity-dependence on phy-  
395 logenetic trees. *PLOS ONE* **9**, 1–15 (2014).
- 396 [43] Stadler, T. Mammalian phylogeny reveals recent diversification rate shifts. *Proceedings of the National*  
397 *Academy of Sciences* **108**, 6187–6192 (2011).
- 398 [44] Akaike, H. Likelihood of a model and information criteria. *Journal of Econometrics* **16**, 3–14 (1981).
- 399 [45] Schwarz, G. Estimating the dimension of a model. *Annals of Statistics* **6**, 461–464 (1978).
- 400 [46] Steeman, M. E. *et al.* Radiation of extant cetaceans driven by restructuring of the oceans. *Systematic*  
401 *Biology* **58**, 573–585 (2009).
- 402 [47] Alfaro, M. E. *et al.* Nine exceptional radiations plus high turnover explain species diversity in jawed  
403 vertebrates. *Proceedings of the National Academy of Sciences* **106**, 13410–13414 (2009).
- 404 [48] Griffiths, R. C. & Tavaré, S. Sampling theory for neutral alleles in a varying environment. *Philosophical*  
405 *Transactions of the Royal Society of London. Series B: Biological Sciences* **344**, 403–410 (1994).
- 406 [49] Donnelly, P. & Tavaré, S. Coalescents and genealogical structure under neutrality. *Annual Review of*  
407 *Genetics* **29**, 401–421 (1995).
- 408 [50] Heath, T. A., Huelsenbeck, J. P. & Stadler, T. The fossilized birth-death process for coherent calibration  
409 of divergence-time estimates. *Proceedings of the National Academy of Sciences* **111**, E2957–E2966  
410 (2014).
- 411 [51] Stadler, T., Gavryushkina, A., Warnock, R. C. M., Drummond, A. J. & Heath, T. A. The fossilized  
412 birth-death model for the analysis of stratigraphic range data under different speciation modes. *Journal*  
413 *of Theoretical Biology* **447**, 41–55 (2018).
- 414 [52] Silvestro, D., Warnock, R. C. M., Gavryushkina, A. & Stadler, T. Closing the gap between palaeon-  
415 tological and neontological speciation and extinction rate estimates. *Nature Communications* **9**, 5237  
416 (2018).
- 417 [53] Louca, S. & Doebeli, M. Efficient comparative phylogenetics on large trees. *Bioinformatics* **34**, 1053–  
418 1055 (2017).
- 419 [54] Smith, S. A. & Brown, J. W. Constructing a broadly inclusive seed plant phylogeny. *American Journal*  
420 *of Botany* **105**, 302–314 (2018).

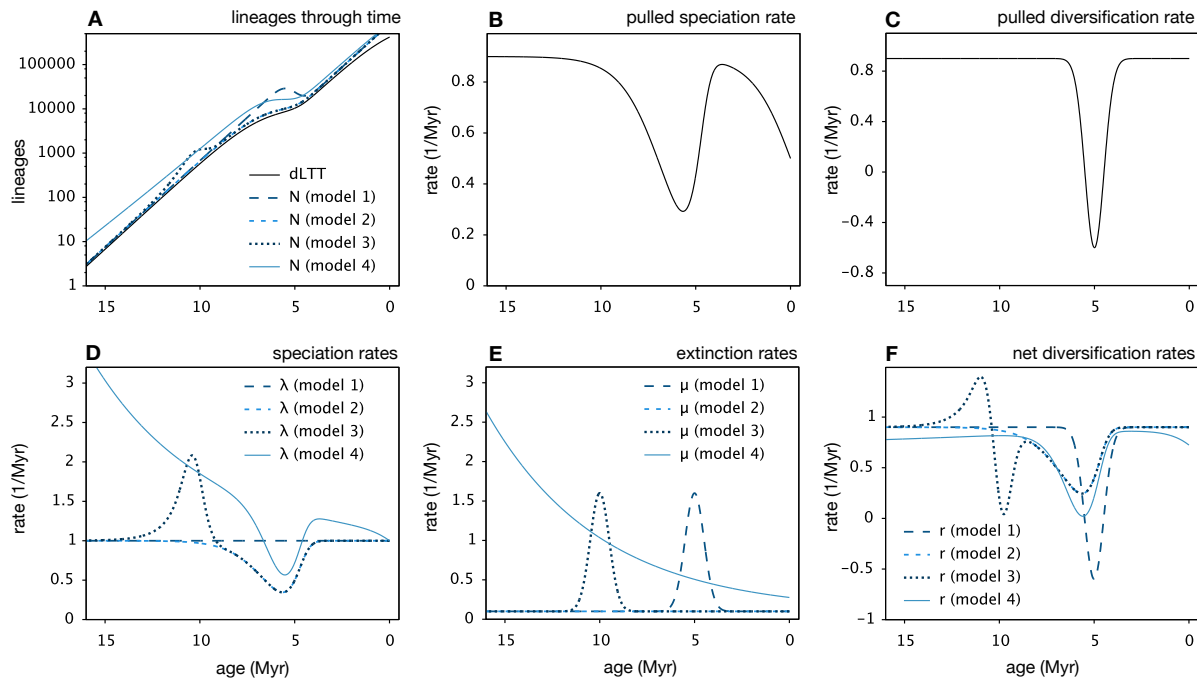

**Figure 1: Illustration of congruent birth-death processes (simulations).** Example of four hypothetical, congruent yet markedly different birth-death models. The first model exhibits a constant speciation rate and a sudden mass extinction event about 5 Myr before present; the second model exhibits a constant extinction rate and a temporary stagnation of the speciation rate about 5–6 Myr before present; the third model exhibits a mass extinction event about 10 Myr before present and a variable speciation rate; the fourth model exhibits an exponentially decreasing extinction rate and a variable speciation rate. In all models the sampling fraction is  $\rho = 0.5$ . All models exhibit the same deterministic LTT (dLTT), the same pulled speciation rate ( $\lambda_p$ ) and the same pulled diversification rate ( $r_p$ ), and would yield the same likelihood for any given extant timetree. (A) dLTT and deterministic total diversities ( $N$ ) predicted by the models, plotted over age (time before present). (B) Pulled extinction rate  $\lambda_p$  of the models. (C) Pulled diversification rate  $r_p$  of the models. (D) Speciation rates ( $\lambda$ ) of the models. (E) Extinction rates ( $\mu$ ) of the models. (F) Net diversification rates ( $r = \lambda - \mu$ ) of the models. For additional examples see Supplemental Fig. S1.

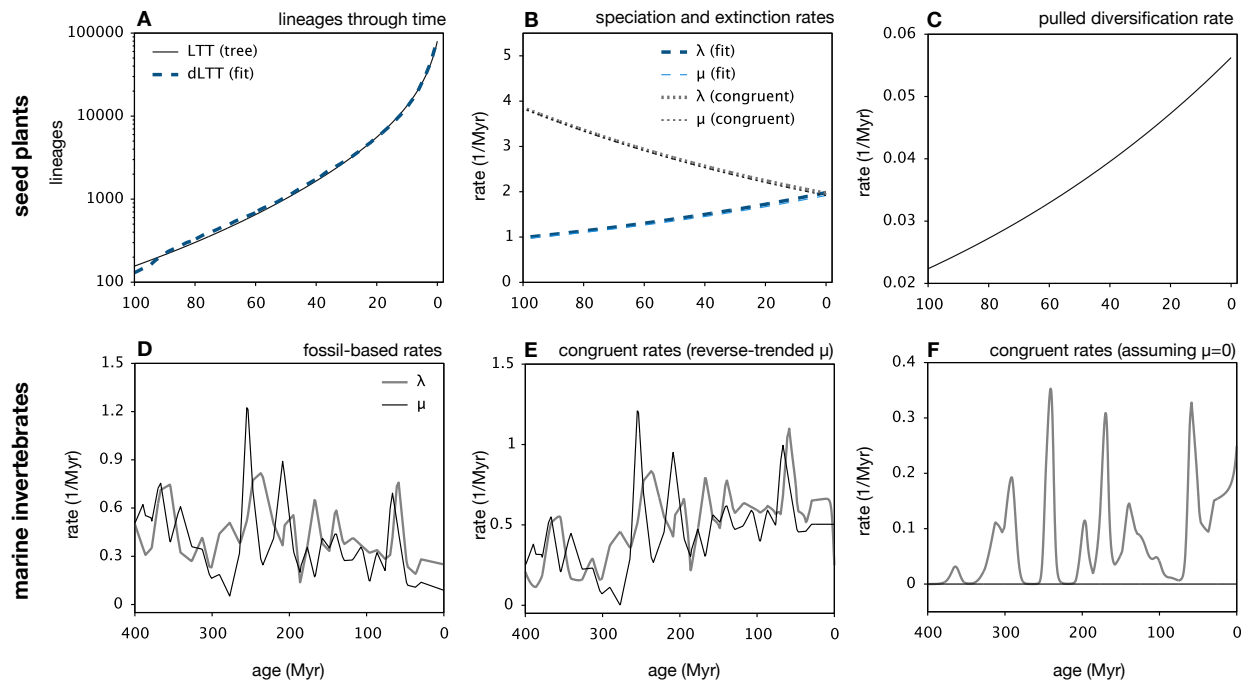

**Figure 2: Illustration of congruent birth-death processes (real data).** Top row: Birth-death model with exponentially varying  $\lambda$  and  $\mu$ , fitted to a reconstruct timetree of 79,874 seed plant species (54) over the past 100 Myr, compared to a congruent model obtained by simply modifying the exponential coefficient of  $\mu$ . (A) LTT of the tree, compared to the dLTT predicted by the two models. (B) Speciation rates ( $\lambda$ ) and extinction rates ( $\mu$ ) of the two models. (C) Pulled diversification rate of the two models. Bottom row: (D) Origination and extinction rates of marine invertebrate genera, estimated from fossil data by Alroy (36). (E) Congruent scenario to D, after reversing the linear trend of  $\mu$ . (F) Congruent scenario to D, assuming zero extinction rate.

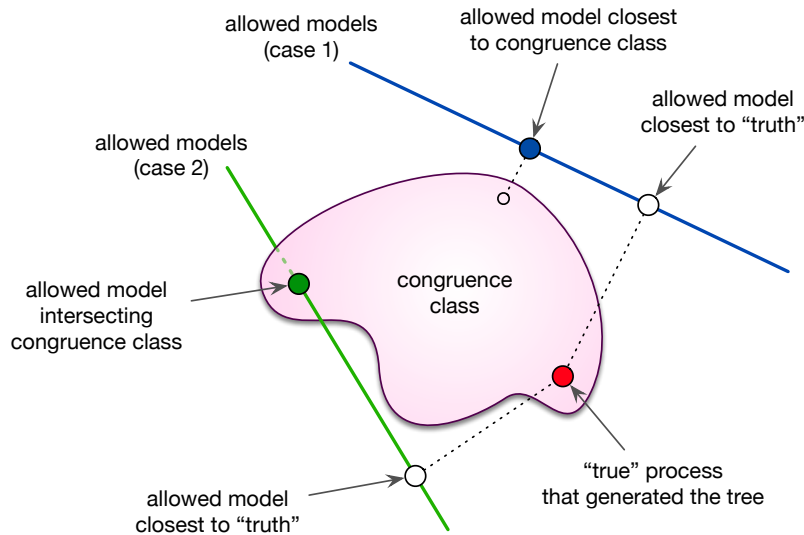

**Figure 3: Conceptual implications for reconstructing diversification history.** Conceptual illustration of the limited identifiability of a diversification process, assumed to be adequately described by some unknown birth-death model (red circle, henceforth “true process”). The congruence class of the true process is shown as a sub-space comprising a continuum of alternative models (pink area). In practice, maximum-likelihood model selection is performed among a parameterized low-dimensional set of allowed models, the precise nature of which can vary from case to case, for example depending on assumed functional forms for  $\lambda$  and  $\mu$  or the number of allowed rate shifts (43). The two continuous lines shown here represent two alternative cases of allowed model sets (e.g., considered in two alternative studies), from within each the model closest to the truth is (ideally) sought. In each case, however, likelihood-based model selection will converge towards the allowed model closest to the congruence class (blue and green filled circles), which in general is not the allowed model actually closest to the true process (white circles). This identifiability issue persists even for infinitely large datasets.

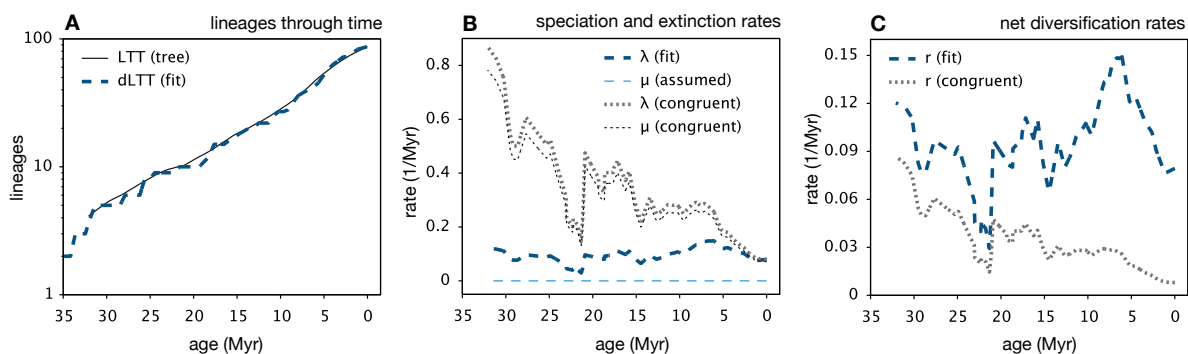

**Figure 4: Previous studies have likely over-interpreted phylogenetic data.** Time-dependent birth-death model fitted to a nearly-complete Cetacean timetree by Steeman *et al.* (46) under the assumption of zero extinction rates ( $\mu = 0$ ), compared to a congruent model where the extinction rate is close to the speciation rate ( $\mu = 0.9\lambda$ ). (A) LTT of the tree, compared to the dLTT predicted by the two models. (B) Speciation rates ( $\lambda$ ) and extinction rates ( $\mu$ ) of the two models. (C) Net diversification rates ( $r = \lambda - \mu$ ) of the two models. The original fitted rates were used by Steeman *et al.* (46) to link Cetacean diversification dynamics to past paleoceanographic changes.

# Phylogenies of extant species are consistent with an infinite array of diversification histories

## - Supplemental Information -

Stilianos Louca<sup>1,2</sup> & Matthew W. Pennell<sup>3,4</sup>

<sup>1</sup>*Department of Biology, University of Oregon, USA*

<sup>2</sup>*Institute of Ecology and Evolution, University of Oregon, USA*

<sup>3</sup>*Biodiversity Research Centre, University of British Columbia, Vancouver, Canada*

<sup>4</sup>*Department of Zoology, University of British Columbia, Vancouver, Canada*

### 1 **Contents**

|    |                                                                                                 |           |
|----|-------------------------------------------------------------------------------------------------|-----------|
| 2  | <b>S.1 Mathematical derivations</b>                                                             | <b>2</b>  |
| 3  | S.1.1 General considerations . . . . .                                                          | 2         |
| 4  | S.1.2 The likelihood in terms of the LTT and dLTT . . . . .                                     | 3         |
| 5  | S.1.3 The likelihood in terms of $\lambda_p$ . . . . .                                          | 6         |
| 6  | S.1.4 Calculating $\lambda$ from $r_p$ and $\mu$ . . . . .                                      | 6         |
| 7  | S.1.5 Calculating $\lambda$ from $r_p$ and $\varepsilon$ . . . . .                              | 8         |
| 8  | S.1.6 The likelihood in terms of the $r_p$ . . . . .                                            | 8         |
| 9  | S.1.7 Congruent models have the same probability distribution of generated tree sizes . . . . . | 10        |
| 10 | S.1.8 The geometric nature of congruence classes . . . . .                                      | 11        |
| 11 | <b>S.2 Why previous studies failed to detect model congruencies</b>                             | <b>13</b> |
| 12 | <b>S.3 Typical model sets do not exhibit congruence ridges</b>                                  | <b>13</b> |
| 13 | <b>S.4 Interpreting the PDR</b>                                                                 | <b>15</b> |
| 14 | <b>S.5 Fitting congruence classes instead of models</b>                                         | <b>15</b> |
| 15 | <b>S.6 Fitting birth-death models to trees yields unreliable results</b>                        | <b>16</b> |
| 16 | <b>S.7 Fitting birth-death models to seed plants</b>                                            | <b>17</b> |
| 17 | <b>S.8 Supplemental figures</b>                                                                 | <b>19</b> |



## 18 S.1 Mathematical derivations

19 In the following, we provide mathematical derivations for various claims made in the main article. Some  
20 parts can be found in previous literature (1, 2, 3, 4, 5, 6), but are included here for completeness.

### 21 S.1.1 General considerations

22 We begin with listing some basic mathematical properties of deterministic birth-death models that will be of  
23 use at various later stages. Our starting point is some time-dependent speciation rate  $\lambda$ , some time-dependent  
24 extinction rate  $\mu$  and some sampling fraction  $\rho$  (fraction of extant species included in the tree). Let  $\tau$  denote  
25 time before present (“age”). The deterministic total diversity, i.e. the number of species predicted at any point  
26 in time according to the deterministic model, and conditional upon  $M_o$  extant species having been sampled  
27 at present-day, is obtained by solving the following differential equation backward in time:

$$\frac{dN}{d\tau} = N \cdot (\mu - \lambda), \quad (1)$$

28 with initial condition  $N(0) = M_o/\rho$ , i.e.:

$$N(\tau) := \frac{M_o}{\rho} \exp \left[ \int_0^\tau du [\mu(u) - \lambda(u)] \right]. \quad (2)$$

29 The deterministic LTT (dLTT), i.e. the number of lineages represented in the final extant timetree at any time  
30 point according to the deterministic model, is given by:

$$M(\tau) = N(\tau) \cdot (1 - E(\tau)), \quad (3)$$

31 where  $E(\tau)$  is the probability that a lineage extant at age  $\tau$  will be missing from the timetree (either due  
32 to extinction or not having been sampled). As explained by Morlon *et al.* (5), the extinction probability  $E$   
33 satisfies the differential equation:

$$\frac{dE}{d\tau} = \mu - E \cdot (\lambda + \mu) + E^2\lambda, \quad E(0) = 1 - \rho. \quad (4)$$

34 We mention that the solution to Eq. (4) is provided by Morlon *et al.* (5, Eq. 2). Taking the derivative of both  
35 sides in Eq. (3), and then using Eq. (4) to replace  $dE/d\tau$  as well as Eq. (1) to replace  $dN/d\tau$  quickly leads  
36 to the differential equation:

$$\frac{dM}{d\tau} = M\lambda \cdot (E - 1), \quad (5)$$

37 with initial condition  $M(0) = M_o$ . The solution to this differential equation is:

$$M(\tau) = M_o \cdot \exp \left[ \int_0^\tau du \lambda(u) \cdot [E(u) - 1] \right]. \quad (6)$$

38 Observe that  $E$  is a property purely of the model, and does not depend on the particular tree considered;  
39 together with Eq. (6), this shows that any two models either have equal dLTTs for any given tree or they have  
40 non-equal dLTTs for any given tree. Hence, model congruency is a property of two models, regardless of  
41 tree.

42 Defining the relative slope of the dLTT:

$$\lambda_p := -\frac{1}{M} \frac{dM}{d\tau} \quad (7)$$

43 allows us to write Eq. (5) as follows:

$$\lambda_p = \lambda \cdot (1 - E). \quad (8)$$

44 We note that  $P(\tau) := 1 - E(\tau)$  is the probability that a lineage extant at age  $\tau$  is represented in the extant  
 45 timetree.  $P$  can thus be interpreted as a generalization of the present-day sampling fraction  $\rho$  to previous  
 46 times. In fact, trimming a timetree at some age  $\tau_o > 0$  (i.e., omitting anything younger than  $\tau_o$ ) would yield  
 47 a new (shorter) timetree, whose tips are a random subset of the lineages that existed at age  $\tau_1$ , each included  
 48 at probability  $P(\tau_o)$ .

49 As becomes clear in Eq. (8), in the absence of extinction and if  $\rho = 1$ , the relative slope  $\lambda_p$  becomes equal  
 50 to the speciation rate  $\lambda$ ; in the presence of extinction  $\lambda_p$  is artificially pulled downwards relative to  $\lambda$  towards  
 51 the past. Reciprocally, under incomplete sampling  $\lambda$  is artificially pulled downwards near the present. We  
 52 shall therefore henceforth call  $\lambda_p$  the “pulled speciation rate”.

53 Taking the derivative on both sides of Eq. (8) and using Eq. (4) to replace  $dE/d\tau$  leads to:

$$\frac{d\lambda_p}{d\tau} = \lambda_p \cdot \left[ \frac{1}{\lambda} \frac{d\lambda}{d\tau} - \mu + \lambda E \right] = \lambda_p \cdot \left[ \frac{1}{\lambda} \frac{d\lambda}{d\tau} + \lambda - \mu - \lambda \cdot (1 - E) \right] = \lambda_p \cdot (r_p - \lambda_p), \quad (9)$$

54 where we defined the “pulled diversification rate”:

$$r_p := \lambda - \mu + \frac{1}{\lambda} \frac{d\lambda}{d\tau}. \quad (10)$$

55 Rearranging terms in Eq. (9) yields:

$$r_p = \lambda_p + \frac{1}{\lambda_p} \frac{d\lambda_p}{d\tau}, \quad (11)$$

56 which shows that  $r_p$  can be directly calculated from the dLTT.

## 57 S.1.2 The likelihood in terms of the LTT and dLTT

58 In the following we show how the likelihood of an extant timetree under a birth-death model can be expressed  
 59 purely in terms of the tree’s LTT and the model’s dLTT. We begin with the case where the stem age is known  
 60 and the likelihood is conditioned on the survival of the stem lineage; the alternative case where only the  
 61 crown age is known is very similar and will be discussed at the end.

62 Our starting point is the likelihood formula described by Morlon *et al.* (5):

$$L = \frac{\rho^{n+1} \Psi(\tau_1, \tau_o)}{1 - E(\tau_o)} \prod_{i=1}^n \lambda(\tau_i) \Psi(s_{i,1}, \tau_i) \Psi(s_{i,2}, \tau_i), \quad (12)$$

63 where  $n$  is the number of branching points (internal nodes),  $\tau_o$  is the age of the stem,  $\tau_1 > \tau_2 > \dots > \tau_n$  are  
 64 the ages (time before present) of the branching points,  $s_{i,1}, s_{i,2}$  are the ages at which the daughter lineages  
 65 originating at age  $\tau_i$  themselves branch (or end at a tip),  $\rho$  is the tree’s sampling fraction (fraction of present-

66 day extant species included in the tree),  $E(\tau)$  is the probability that a single lineage that existed at age  $\tau$   
 67 would survive to the present and be represented in the tree (5, Eq. 2 therein),  $\Psi$  is defined as:

$$\Psi(s, \tau) := e^{R(\tau) - R(s)} \left[ \frac{1 + \rho \int_0^s du \lambda(u) e^{R(u)}}{1 + \rho \int_0^\tau du \lambda(u) e^{R(u)}} \right]^2, \quad (13)$$

68 and  $R(\tau)$  is defined as:

$$R(\tau) := \int_0^\tau du [\lambda(u) - \mu(u)]. \quad (14)$$

69 It is straightforward to confirm that  $\Psi$  satisfies the property  $\Psi(s, \tau) = \Psi(0, \tau) / \Psi(0, s)$ ; using this property  
 70 in Eq. (12) leads to:

$$L = \frac{\rho^{n+1}}{1 - E(\tau_o)} \cdot \frac{\Psi(0, \tau_o)}{\Psi(0, \tau_1)} \prod_{i=1}^n \frac{\lambda(\tau_i) \Psi(0, \tau_i)^2}{\Psi(0, s_{i,1}) \Psi(0, s_{i,2})}. \quad (15)$$

71 Since each internal node except for the root is the child of another internal node, the enumerator and denom-  
 72 inator in Eq. (15) partly cancel out, eventually leading to:

$$L = \frac{\rho^{n+1} \Psi(0, \tau_o)}{1 - E(\tau_o)} \prod_{i=1}^n \lambda(\tau_i) \Psi(0, \tau_i). \quad (16)$$

73 Since the set of branching times  $\tau_i$  is completely determined by the LTT (branching events correspond to  
 74 jumps in the LTT), we conclude that the likelihood of a tree is entirely determined by its LTT.

75 Further, from Eq. (11) we know that the model's dLTT satisfies:

$$\lambda - \mu + \frac{d \ln \lambda}{d\tau} = \frac{d \ln \lambda_p}{d\tau} - \frac{d \ln M}{d\tau}. \quad (17)$$

76 Integrating both sides of Eq. (17) yields:

$$R(\tau) + \ln \frac{\lambda(\tau)}{\lambda_o} = \int_0^\tau du \left[ \lambda - \mu + \frac{d \ln \lambda}{du} \right] = \int_0^\tau du \left[ \frac{d \ln \lambda_p}{du} - \frac{d \ln M}{du} \right] = \ln \frac{\lambda_p(\tau)}{\lambda_p(0)} - \ln \frac{M(\tau)}{M_o}, \quad (18)$$

77 where  $M_o$  is the number of extant species included in the timetree. Hence:

$$e^{R(\tau)} \frac{\lambda(\tau)}{\lambda_o} = \frac{\lambda_p(\tau) M_o}{\lambda_p(0) M(\tau)}. \quad (19)$$

78 Using Eq. (19) in Eq. (13) yields:

$$\Psi(0, \tau) = \frac{\lambda_o}{\lambda(\tau)} \cdot \frac{\lambda_p(\tau) M_o}{\lambda_p(0) M(\tau)} \cdot \left[ 1 + \frac{\rho \lambda_o}{\lambda_p(0)} M_o \int_0^\tau du \frac{\lambda_p(u)}{M(u)} \right]^{-2} \quad (20)$$

79 Recall that  $\rho \lambda_o = \lambda_p(0)$  according to Eq. (8), so that Eq. (20) can be written as:

$$\Psi(0, \tau) = \frac{1}{\rho \lambda(\tau)} \cdot \frac{\lambda_p(\tau) M_o}{M(\tau)} \cdot \left[ 1 + M_o \int_0^\tau du \frac{\lambda_p(u)}{M(u)} \right]^{-2}. \quad (21)$$

80 Note that:

$$\frac{\lambda_p}{M} = \frac{d}{d\tau} \frac{1}{M}. \quad (22)$$

81 Hence, Eq. (21) can be further simplified to:

$$\begin{aligned} \Psi(0, \tau) &= \frac{1}{\rho\lambda(\tau)} \cdot \frac{\lambda_p(\tau)M_o}{M(\tau)} \cdot \left[ 1 + M_o \int_0^\tau du \frac{d}{du} \left( \frac{1}{M} \right) \right]^{-2} \\ &= \frac{1}{\rho\lambda(\tau)} \cdot \frac{\lambda_p(\tau)M_o}{M(\tau)} \cdot \left[ 1 + M_o \left( \frac{1}{M(\tau)} - \frac{1}{M_o} \right) \right]^{-2} \\ &= \frac{\lambda_p(\tau)M(\tau)}{\rho\lambda(\tau)M_o}. \end{aligned} \quad (23)$$

82 Inserting Eq. (23) into the likelihood formula (16) yields:

$$L = \frac{1}{[1 - E(\tau_o)] \lambda(\tau_o)} \cdot \frac{\lambda_p(\tau_o)M(\tau_o)}{M_o^{n+1}} \prod_{i=1}^n \lambda_p(\tau_i)M(\tau_i). \quad (24)$$

83 Recall that  $(1 - E)\lambda = \lambda_p$  according to Eq. (8), which when inserted into (24) yields:

$$L = \frac{M(\tau_o)}{M_o^{n+1}} \prod_{i=1}^n \lambda_p(\tau_i)M(\tau_i). \quad (25)$$

84 Since  $\lambda_p M = -dM/d\tau$ , Eq. (25) becomes:

$$L = \frac{M(\tau_o)}{M_o^{n+1}} \prod_{i=1}^n \left[ -\frac{dM}{d\tau} \Big|_{\tau_i} \right]. \quad (26)$$

85 A corollary of Eq. (26) is that for any given extant timetree, any two models with the same dLTT will also  
86 yield the same likelihood.

87 Note that the likelihood in Eq. (12) or equivalently Eq. (26) is conditioned upon the survival of the stem  
88 lineage, assuming that the stem age is known. If the stem age is unknown the likelihood should be conditioned  
89 upon the splitting at the root and the survival of the root's two daughter-lineages, as follows:

$$L_r = \frac{\rho^{n+1}}{\lambda(\tau_1) \cdot [1 - E(\tau_1)]^2} \prod_{i=1}^n \lambda(\tau_i) \Psi(s_{i,1}, \tau_i) \Psi(s_{i,2}, \tau_i). \quad (27)$$

90 Note that Eq. (27) can be obtained from (12) by setting the stem age equal to the crown age ( $\tau_o = \tau_1$ )  
91 and adjusting the conditioning. Following a similar procedure as above, it is easy to show that  $L_r$  can be  
92 expressed in the following alternative forms:

$$L_r = \frac{\rho^{n+1} \Psi(0, \tau_1)}{\lambda(\tau_1) \cdot [1 - E(\tau_1)]^2} \prod_{i=1}^n \lambda(\tau_i) \Psi(0, \tau_i), \quad (28)$$

93 and

$$L_r = \frac{M^2(\tau_1)}{M_o^{n+1}} \prod_{i=2}^n \left[ -\frac{dM}{d\tau} \Big|_{\tau_i} \right]. \quad (29)$$

94

□

### 95 **S.1.3 The likelihood in terms of $\lambda_p$**

96 In the following we show how the likelihood of an extant timetree under a birth-death model can be expressed  
97 purely in terms of the tree's LTT and the model's pulled speciation rate  $\lambda_p$ .

98 We begin with the case where the stem age is known and the likelihood is conditioned on the survival of the  
99 stem lineage. Our starting point is the likelihood formula in Eq. (26):

$$L = \frac{M(\tau_o)}{M_o^{n+1}} \prod_{i=1}^n \left[ -\frac{dM}{d\tau} \Big|_{\tau_i} \right], \quad (30)$$

100 where  $M$  is the dLTT and  $M_o := M(0)$ . From Eq. (7) it is easy to obtain the following relationship between  
101  $M$  and  $\lambda_p$ :

$$M(\tau) = M_o e^{-\Lambda_p(\tau)}, \quad (31)$$

102 where we defined:

$$\Lambda_p(\tau) := \int_0^\tau ds \lambda_p(s). \quad (32)$$

103 Inserting Eq. (31) into Eq. (30) yields:

$$L = e^{-\Lambda_p(\tau_o)} \prod_{i=1}^n \underbrace{\frac{-1}{M(\tau_i)} \frac{dM}{d\tau} \Big|_{\tau_i}}_{\lambda_p(\tau_i)} \cdot e^{-\Lambda_p(\tau_i)}, \quad (33)$$

104 and hence:

$$L = e^{-\Lambda_p(\tau_o)} \prod_{i=1}^n \lambda_p(\tau_i) \cdot e^{-\Lambda_p(\tau_i)}. \quad (34)$$

105 If only the crown age is known and the likelihood is conditioned on the splitting at the root and the survival  
106 of the root's two daughter-lineages (likelihood formula in Eq. (29)), we instead obtain the expression:

$$L_r = \frac{e^{-\Lambda_p(\tau_1)}}{\lambda_p(\tau_1)} \prod_{i=1}^n \lambda_p(\tau_i) \cdot e^{-\Lambda_p(\tau_i)}. \quad (35)$$

### 107 **S.1.4 Calculating $\lambda$ from $r_p$ and $\mu$**

108 In the following we provide the general solution to the differential equation (4) in the main article:

$$\frac{d\lambda}{d\tau} = \lambda \cdot (r_p + \mu^* - \lambda), \quad (36)$$

109 with initial condition:

$$\lambda(0) = \eta_o / \rho > 0. \quad (37)$$

110 We assume that  $r_p$  and  $\mu^*$  are sufficiently “well-behaved”, specifically that they are integrable over any finite  
 111 interval. Observe that Eq. (36) is an example of a Bernoulli-type differential equation, as it can be written  
 112 in the standard form:

$$\frac{d\lambda}{d\tau} = p(\tau)\lambda(\tau) + q(\tau)\lambda^\alpha(\tau), \quad (38)$$

113 where  $\alpha = 2$ ,  $p = r_p + \mu^*$  and  $q = -1$ . Using the standard technique for solving Bernoulli differential  
 114 equations (i.e., substituting  $u = \lambda^{1-\alpha}$  to obtain a linear differential equation for  $u$ ), it is straightforward to  
 115 obtain the solution:

$$\lambda(\tau) = \frac{\eta_o e^{\Lambda(\tau)}}{\rho + \eta_o \int_0^\tau ds e^{\Lambda(s)}}, \quad (39)$$

116 where we defined:

$$\Lambda(\tau) := \int_0^\tau ds [r_p(s) + \mu^*(s)]. \quad (40)$$

117 Note that the solution in Eq. (39) is strictly positive and continuous, and hence  $\lambda$  is indeed a valid speciation  
 118 rate.

119 For future reference, we mention that the above solution can be easily generalized to the case where the  
 120 “initial condition” for  $\lambda$  is given at some arbitrary age  $\tau_1$ , rather than at present-day. Specifically, the solution  
 121 to the differential equation:

$$\frac{d\lambda}{d\tau} = \lambda \cdot (r_p + \mu^* - \lambda), \quad (41)$$

122 with condition:

$$\lambda(\tau_1) = \lambda_1, \quad (42)$$

123 is given by:

$$\lambda(\tau) = \frac{\lambda_1 e^{\Lambda(\tau)}}{e^{\Lambda(\tau_1)} + \lambda_1 \int_0^\tau ds e^{\Lambda(s)} - \lambda_1 \int_0^{\tau_1} ds e^{\Lambda(s)}}. \quad (43)$$

#### 124 **Special cases:**

125 • In the special case where  $r_p$  and  $\mu^*$  are time-independent and  $r_p + \mu^* \neq 0$ , the solution in Eq. (39)  
 126 takes the form:

$$\lambda(\tau) = \frac{P}{(P\rho/\eta_o - 1)e^{-P\tau} + 1}, \quad (44)$$

127 where  $P = r_p + \mu^*$ .

128 • If and only if  $\mu^*(\tau) = \eta_o/\rho - r_p(\tau)$ , the solution in Eq. (39) is time-independent:

$$\lambda(\tau) = \frac{\eta_o}{\rho}. \quad (45)$$

129 Hence, for a fixed  $\rho$ , a congruence class can include at most one model with constant speciation rate;  
 130 it includes exactly one model with constant speciation rate if and only if  $\eta_o/\rho \geq \max_{\tau} r_p(\tau)$ .

### 131 **S.1.5 Calculating $\lambda$ from $r_p$ and $\varepsilon$**

132 In the following we show how the speciation rate  $\lambda$  can be calculated from the pulled diversification rate  $r_p$ ,  
 133 the present-day speciation rate  $\lambda_o$  and the ratio of extinction over speciation rate,  $\varepsilon := \mu/\lambda$ . Specifically, we  
 134 provide the general solution to the following differential equation:

$$\frac{d\lambda}{d\tau} = \lambda \cdot [r_p + (\varepsilon - 1)\lambda]. \quad (46)$$

135 We assume that  $r_p$  and  $\varepsilon$  are sufficiently “well-behaved”, specifically that they are integrable over any finite  
 136 interval. Observe that Eq. (46) is an example of a Bernoulli-type differential equation, as it can be written  
 137 in the standard form:

$$\frac{d\lambda}{d\tau} = p(\tau)\lambda(\tau) + q(\tau)\lambda^\alpha(\tau), \quad (47)$$

138 where  $\alpha = 2$ ,  $p = r_p$  and  $q = \varepsilon - 1$ . Using the standard technique for solving Bernoulli differential equations  
 139 (i.e., substituting  $u = \lambda^{1-\alpha}$  to obtain a linear differential equation for  $u$ ), it is straightforward to obtain the  
 140 solution:

$$\lambda(\tau) = \frac{\lambda_o e^{R_p(\tau)}}{1 + (1 - \varepsilon) \cdot \lambda_o \int_0^\tau ds e^{R_p(s)}}, \quad (48)$$

141 where we defined:

$$R_p(\tau) := \int_0^\tau ds r_p(s). \quad (49)$$

142 In the special case where  $r_p$  is time-independent and non-zero, the solution in Eq. (48) simplifies to:

$$\lambda(\tau) = \frac{\lambda_o e^{r_p \tau}}{1 + (1 - \varepsilon) \cdot \frac{\lambda_o}{r_p} (e^{r_p \tau} - 1)}. \quad (50)$$

### 143 **S.1.6 The likelihood in terms of the $r_p$**

144 In the following we show how the likelihood of a tree under a birth-death model can be expressed solely in  
 145 terms of the model’s pulled diversification rate  $r_p$  and the product  $\rho\lambda_o$ . We first consider the case where the  
 146 stem age is known and the likelihood is conditioned on the survival of the stem lineage (5); the alternative  
 147 case where only the crown age is known and the likelihood is conditioned upon the survival of the root’s two  
 148 daughter lineages (Eq. 28) can be treated similarly and is briefly mentioned at the end.

149 Our starting point is the likelihood formula in Eq. (16), Supplement S.1.2. Define:

$$R_p(\tau) := \int_0^\tau du r_p(u). \quad (51)$$

150 Then from the definition of  $r_p$  (Eq. 1 in the main article) we have:

$$R_p(\tau) = \int_0^\tau du [\lambda(u) - \mu(u)] + \int_0^\tau du \frac{d \ln \lambda}{du} = R(\tau) + \ln \frac{\lambda(\tau)}{\lambda_o}. \quad (52)$$

151 Exponentiating (52) and rearranging yields:

$$e^{R(\tau)} = e^{R_p(\tau)} \frac{\lambda_o}{\lambda(\tau)}. \quad (53)$$

152 Inserting Eq. (53) into the definition of  $\Psi$  in Eq. (13) yields:

$$\Psi(0, \tau) = e^{R_p(\tau)} \frac{\lambda_o}{\lambda(\tau)} \left[ 1 + \rho \lambda_o \int_0^\tau du e^{R_p(u)} \right]^{-2}. \quad (54)$$

153 Inserting Eq. (54) into the likelihood formula (16) yields:

$$L = \frac{(\rho \lambda_o)^{n+1} e^{R_p(\tau_o)}}{[1 - E(\tau_o)] \lambda(\tau_o)} \left[ 1 + \rho \lambda_o \int_0^{\tau_o} du e^{R_p(u)} \right]^{-2} \prod_{i=1}^n e^{R_p(\tau)} \left[ 1 + \rho \lambda_o \int_0^\tau du e^{R_p(u)} \right]^{-2}. \quad (55)$$

154 Recall that  $(1 - E)\lambda = \lambda_p$  according to Eq. (8), which when inserted into Eq. (55) yields:

$$L = \frac{(\rho \lambda_o)^{n+1} e^{R_p(\tau_o)}}{\lambda_p(\tau_o)} \left[ 1 + \rho \lambda_o \int_0^{\tau_o} du e^{R_p(u)} \right]^{-2} \prod_{i=1}^n e^{R_p(\tau)} \left[ 1 + \rho \lambda_o \int_0^\tau du e^{R_p(u)} \right]^{-2}. \quad (56)$$

155 From Eqs. (8) and (11) we know that  $\lambda_p$  satisfies the initial value problem (Bernoulli differential equation):

$$\frac{d\lambda_p}{d\tau} = \lambda_p \cdot (r_p - \lambda_p), \quad \lambda_p(0) = \rho \lambda_o. \quad (57)$$

156 It is straightforward to verify that the solution to Eq. (57) is given by:

$$\lambda_p(\tau) = \frac{\rho \lambda_o e^{R_p(\tau)}}{1 + \rho \lambda_o \int_0^\tau e^{R_p(u)} du}. \quad (58)$$

157 Inserting the solution (58) into Eq. (56) yields the following expression for the likelihood:

$$L = \left[ 1 + \rho \lambda_o \int_0^{\tau_o} du e^{R_p(u)} \right]^{-1} (\rho \lambda_o)^n \prod_{i=1}^n e^{R_p(\tau)} \left[ 1 + \rho \lambda_o \int_0^\tau du e^{R_p(u)} \right]^{-2}. \quad (59)$$

158 In the alternative case where only the crown age is known, and the likelihood is conditioned on the splitting  
159 at the root and the survival of the root's two daughter lineages, we obtain the following expression for the  
160 likelihood:

$$L_r = e^{-R_p(\tau_o)} (\rho \lambda_o)^{n-1} \prod_{i=1}^n e^{R_p(\tau)} \left[ 1 + \rho \lambda_o \int_0^\tau du e^{R_p(u)} \right]^{-2}. \quad (60)$$



### 161 **S.1.7 Congruent models have the same probability distribution of generated tree sizes**

162 In the following, we show that the distribution of extant timetree sizes generated by a birth-death model,  
 163 either conditional upon the age and survival of the stem, or conditional upon the age of the root and the  
 164 survival of its two daughter lineages, is the same for all models in a congruence class.

165 Consider a birth-death process with parameters  $(\lambda, \mu, \rho)$ , starting from a single lineage at some time before  
 166 present  $\tau_o$  and ultimately resulting in a timetree at age 0, comprising only extant species that are included at  
 167 some probability  $\rho$ . The probability that the timetree will comprise  $n$  tips can be expressed using formulas  
 168 first derived by Kendall *et al.* (7):

$$\begin{aligned} P(n) &= (1 - E(\tau_o)) \cdot (1 - H) \cdot H^{n-1}, \quad n \geq 1 \\ P(0) &= E(\tau_o), \end{aligned} \tag{61}$$

169 where  $E(\tau_o)$  is the probability that a lineage existing at age  $\tau_o$  will be missing from the timetree (as defined  
 170 previously),  $H$  is defined as:

$$H := \frac{\rho \int_0^{\tau_o} ds e^{R(s)} \lambda(s)}{1 + \rho \int_0^{\tau_o} ds e^{R(s)} \lambda(s)}, \tag{62}$$

171 and  $R$  was previously defined in Eq. (14). Note that the formula in Eq. (61) can be readily obtained using  
 172 equations 8, 10b and 11 in (7), after setting the time variable therein equal to  $\tau_o$  (i.e.  $t = \tau_o$ ), switching  
 173 from time to age ( $\tau = \tau_o - t$ ), and adding the term  $-\delta(\tau) \ln \rho$  to the extinction rate (where  $\delta$  is the Dirac  
 174 distribution, peaking at age 0) to account for incomplete species sampling. As shown previously in Eq. (53),  
 175 we have

$$e^{R(\tau)} = e^{R_p(\tau)} \frac{\lambda_o}{\lambda(\tau)}, \tag{63}$$

176 where  $R_p$  is defined as:

$$R_p(\tau) := \int_0^\tau du r_p(u), \tag{64}$$

177 and  $r_p$  is the pulled diversification rate. Inserting Eq. (63) into Eq. (62) allows us to write  $H$  as follows:

$$H = \frac{\rho \lambda_o \int_0^{\tau_o} ds e^{R_p(s)}}{1 + \rho \lambda_o \int_0^{\tau_o} ds e^{R_p(s)}}. \tag{65}$$

178 Since  $\rho \lambda_o$ ,  $r_p$  and  $R_p$  are the same for all models in a congruence class,  $H$  is also constant across the  
 179 congruence class.

180 The probability of obtaining a tree of size  $n \geq 1$  conditional upon the age of the stem lineage ( $\tau_o$ ) and its  
 181 survival to the present, denoted  $P_{\text{stem}}(n)$ , is given by the ratio  $P(n)/(1 - E(\tau_o))$ , i.e.:

$$\boxed{P_{\text{stem}}(n) = (1 - H) \cdot H^{n-1}}. \tag{66}$$

182 Since  $H$  is constant across a congruence class, the same also holds for  $P_{\text{stem}}(n)$  for any  $n$ . The probability

183 of obtaining a tree of size  $n \geq 1$  conditional upon the splitting of the root at age  $\tau_o$  and the survival of its  
 184 two daughter lineages, denoted  $P_{\text{root}}(n)$ , can be derived in a similar way, as follows. The probability that  
 185 the two daughter lineages survive, conditional upon the split at age  $\tau_o$ , is given by the product:

$$P(\text{daughter lineages survive} \mid \text{split at } \tau_o) = (1 - E(\tau_o))^2. \quad (67)$$

186 The probability that the two daughter lineages survive and the timetree has size  $n \geq 1$ , conditional upon the  
 187 split at age  $\tau_o$ , is given by the following sum of probabilities:

$$\begin{aligned} & P(\text{daughter lineages survive and tree has size } n \mid \text{split at } \tau_o) \\ &= \sum_{k=1}^{n-1} P(k)P(n-k) \\ &= (1 - E(\tau_o))^2 \sum_{k=1}^{n-1} (1 - H) \cdot H^{k-1} \cdot (1 - H) \cdot H^{n-k-1} \\ &= (1 - E(\tau_o))^2 (1 - H)^2 \sum_{k=1}^{n-1} H^{n-2} \\ &= (n - 1) \cdot (1 - E(\tau_o))^2 (1 - H)^2 H^{n-2}. \end{aligned} \quad (68)$$

188 Dividing Eq. (68) by Eq. (67) yields the desired probability:

$$\boxed{P_{\text{root}}(n) = (n - 1) \cdot (1 - H)^2 H^{n-2}.} \quad (69)$$

189 Since  $H$  is constant across the congruence class, the same also holds for  $P_{\text{root}}(n)$ . □

### 191 S.1.8 The geometric nature of congruence classes

192 In the following, we provide a geometric interpretation of model congruence classes, by pointing out an  
 193 analogy to the concept of object congruency in geometry. A basic background in abstract algebra is assumed.

194 In geometry, two objects are called congruent if they exhibit similar geometric properties, such as identical  
 195 angles between corresponding lines and identical distances between corresponding points. More precisely,  
 196 two geometric objects (sets of points in Euclidean space  $\mathbb{R}^n$ ) are called congruent if one set can be trans-  
 197 formed into the other set by means of an isometry, i.e. a mapping that preserves distances between pairs of  
 198 points (via translations, rotations, and/or reflections). Object congruency is a type of equivalence relation,  
 199 and hence the set of models congruent to some focal object is an equivalence class. The set of all isometries  
 200 is itself a group (known as “Euclidean group”) that acts on the set of geometric objects, and congruence  
 201 classes of objects correspond to “orbits” under the action of isometries (8).

202 By analogy, two birth-death models are called “congruent” if they exhibit similar statistical properties in  
 203 terms of their generated extant timetrees and LTTs (see main text and Supplement S.1). In fact, congruence  
 204 classes can be interpreted as the orbits of a group of mappings acting on model space that preserve dLTTs (just  
 205 as isometries preserve distances in Euclidean space). For technical reasons, we shall henceforth only consider  
 206 the space of birth-death models (denoted  $\mathcal{B}$ ) with strictly positive  $\lambda$ ,  $\mu$  and  $\rho$  and continuously differentiable  $\lambda$   
 207 and  $\mu$  defined over some age interval  $[0, \tau_o] \subseteq \mathbb{R}$ . Let  $\mathcal{C}_+^1[0, \tau_o]$  denote the set of all continuously differentiable  
 208 real-valued strictly positive functions defined on the interval  $[0, \tau_o]$ . For any  $S_o \in (0, \infty)$  and any  $f \in$

209  $\mathcal{C}_+^1[0, \tau_o]$ , define  $S[S_o, f] \in \mathcal{C}_+^1[0, \tau_o]$  as the solution to the following initial value problem:

$$\frac{dS[S_o, f]}{d\tau} = S[S_o, f](\tau) \cdot [f(\tau) - S[S_o, f](\tau)], \quad S[S_o, f](0) = S_o. \quad (70)$$

210 It is straightforward to verify that the solution to the above problem is given by:

$$S[S_o, f](\tau) = \frac{S_o e^{F(\tau)}}{1 + S_o \int_0^\tau ds e^{F(s)}}, \quad (71)$$

211 where we denoted:

$$F(\tau) := \int_0^\tau ds f(s). \quad (72)$$

212 For any arbitrary  $\alpha \in (0, \infty)$  and  $\beta \in \mathcal{C}_+^1[0, \tau_o]$ , let  $g_{\alpha, \beta} : \mathcal{B} \rightarrow \mathcal{B}$  be a transformation of birth-death models  
213 defined as follows:

$$g_{\alpha, \beta}(\lambda, \mu, \rho) := \left( S \left[ \lambda/\alpha, \lambda - \mu + \frac{1}{\lambda} \frac{d\lambda}{d\tau} + \beta\mu \right], \beta\mu, \alpha\rho \right). \quad (73)$$

214 Note that  $g_{\alpha, \beta}$  is dLTT-preserving, that is, it maps models to models within the same congruence class.  
215 Indeed, the variable

$$\lambda^* := S \left[ \lambda/\alpha, \lambda - \mu + \frac{1}{\lambda} \frac{d\lambda}{d\tau} + \beta\mu \right] \quad (74)$$

216 is exactly the speciation rate of a model with extinction rate  $\mu^* := \beta\mu \in \mathcal{C}_+^1[0, \tau_o]$  and sampling fraction  
217  $\rho^* := \alpha\rho \in (0, \infty)$ , congruent to the original model  $(\lambda, \mu, \rho)$ . The set of all such transformations,

$$G := \left\{ g_{\alpha, \beta} : \alpha \in (0, \infty), \beta \in \mathcal{C}_+^1[0, \tau_o] \right\}, \quad (75)$$

218 constitutes a group with group operation:

$$g_{\alpha, \beta} \circ g_{\tilde{\alpha}, \tilde{\beta}} := g_{\alpha\tilde{\alpha}, \beta\tilde{\beta}} \quad (76)$$

219 and identity element  $g_{1,1}$ . The group  $G$  acts on the set of birth-death models, while preserving dLTTs.  
220 Abstractly, each mapping  $g \in G$  corresponds to an “isometric” transformation in model space that preserves  
221 the statistics of generated extant timetrees and dLTTs, in analogy to how rotations, translations or reflections  
222 preserve distances in Euclidean space.

223 Note that not all dLTT-preserving mappings defined on  $\mathcal{B}$  are members of  $G$ . It turns out, however, that  $G$  is  
224 large enough to completely generate congruence classes in  $\mathcal{B}$ . In other words, for any model  $(\lambda, \mu, \rho) \in \mathcal{B}$ ,  
225 the orbit:

$$G(\lambda, \mu, \rho) := \{g(\lambda, \mu, \rho) : g \in G\} \quad (77)$$

226 is exactly the congruence class of the model; indeed, for any congruent model  $(\lambda^*, \mu^*, \rho^*) \in \mathcal{B}$  one can find  
227 a transformation  $g_{\alpha, \beta} \in G$  such that  $(\lambda^*, \mu^*, \rho^*) = g_{\alpha, \beta}(\lambda, \mu, \rho)$ , by choosing  $\alpha := \rho^*/\rho$  and  $\beta := \mu^*/\mu$ .

## 228 **S.2 Why previous studies failed to detect model congruencies**

229 In practice, reconstructions of  $\lambda$  and  $\mu$  over time are typically performed by selecting among a limited set  
230 of allowed models, i.e., considering specific functional forms described by a finite number of parameters  
231 (9, 10, 11, 12, 13, 5). In these situations it is generally unlikely that the allowed model set intersects a given  
232 congruence class more than once (see Supplement S.3 for mathematical justification). For example, when  
233 considering only constant-rate birth-death models and assuming that  $\rho$  is fixed (as is usually the case; 14),  
234 each congruence class reduces to a single combination of  $\lambda$  and  $\mu$ . Likelihood functions defined over a limited  
235 allowed model set thus generally don't exhibit ridges associated with congruence classes, and may even  
236 exhibit a unique global maximum in the space of considered parameters, leaving the impression that  $\lambda$  and  $\mu$   
237 have been estimated close to their true values. Our findings suggest that this impression is almost certainly  
238 false. Instead, obtained estimates for  $\lambda$  and  $\mu$  are almost always going to be a random outcome that depends  
239 on the particular choice of allowed models, such as the functional forms considered for  $\lambda$  and  $\mu$ , and will be  
240 as close as possible to the congruence class of the truth rather than close to the truth itself. Unless one has  
241 reasons to prefer specific functional forms for  $\lambda$  and  $\mu$  (e.g., based on a mechanistic macroevolutionary model;  
242 15), fitted  $\lambda$  and  $\mu$  are unlikely to resemble the true rates even if in principle the functional forms considered  
243 are flexible enough to resemble the true  $\lambda$  and  $\mu$  (see Supplement S.6 for examples using simulations and  
244 real data).

245 By analogy, studies that test whether diversification dynamics are influenced by some environmental or ge-  
246 ological variable  $X$  (e.g., temperature), either by testing for correlations between  $X$  and the estimated  $\lambda$  or  
247  $\mu$  (16, 17) or by fitting models in which  $\lambda$  or  $\mu$  are explicit functions of  $X$  (18, 19, 20), will generally lead to  
248 unreliable conclusions. Indeed, specifying  $\lambda$  or  $\mu$  as functions of  $X$  (e.g., assuming  $\mu = \alpha X + \beta$  and fitting  
249 the coefficients  $\alpha$  and  $\beta$ ) is essentially equivalent to choosing particular functional forms for  $\lambda$  or  $\mu$ . Inciden-  
250 tally, evaluations of estimation methods based on simulations of the same limited model set as considered by  
251 the very estimation method evaluated (9, 11, 12, 13, 5), for example simulating trees with linearly varying  
252  $\lambda$  and  $\mu$  and then fitting models with linearly varying  $\lambda$  and  $\mu$  to check if linear coefficients are accurately  
253 estimated, can generate the false impression that  $\lambda$  and  $\mu$  can in general be reliably identified. Indeed, any  
254 given simulated model is typically going to be the sole representative of its congruence class that's also in  
255 the method's allowed model set.

## 256 **S.3 Typical model sets do not exhibit congruence ridges**

257 In the following we explain why it is unlikely in practice that a limited set of allowed models (e.g., considered  
258 for maximum-likelihood estimation) will intersect any given congruence class more than once, and that it  
259 is especially unlikely that multiple intersections of a congruence class form a sub-manifold in parameter  
260 space (i.e., a "congruence ridge"). Consider a set of allowed models, parameterized through  $n$  independent  
261 parameters  $q_1, \dots, q_n \in \mathbb{R}$ , i.e. such that the speciation and extinction rates of a model are given as functions  
262 of age ( $\tau$ ) and the chosen parameters ( $\mathbf{q} \in \mathbb{R}^n$ ):

$$\lambda = \lambda(\tau, \mathbf{q}), \quad \mu = \mu(\tau, \mathbf{q}). \quad (78)$$

263 For simplicity, assume that the sampling fraction  $\rho$  is given (identifiability issues associated with uncertainties  
264 in  $\rho$  are already well known; 21, 22, 23, 24).

265 Now consider some particular choice of parameters,  $\mathbf{q}$ , with corresponding PDR:

$$r_p(\tau, \mathbf{q}) = \lambda(\tau, \mathbf{q}) - \mu(\tau, \mathbf{q}) + \frac{1}{\lambda(\tau, \mathbf{q})} \frac{\partial \lambda(\tau, \mathbf{q})}{\partial \tau}, \quad (79)$$

266 and present-day speciation rate  $\lambda(0, \mathbf{q})$ . For any other choice of parameters  $\mathbf{h} \in \mathbb{R}^n$ , the corresponding model  
 267 would be in the same congruence class as the first model if and only if  $\lambda(0, \mathbf{h}) = \lambda(0, \mathbf{q})$  and  $r_p(\tau, \mathbf{h}) =$   
 268  $r_p(\tau, \mathbf{q})$  for all ages  $\tau \geq 0$ , in other words  $\lambda(\cdot, \mathbf{h})$  must be a solution to the initial value problem:

$$\frac{\partial \lambda(\tau, \mathbf{h})}{\partial \tau} = \lambda(\tau, \mathbf{h}) \cdot [r_p(\tau, \mathbf{q}) - \lambda(\tau, \mathbf{h}) + \mu(\tau, \mathbf{h})], \quad \lambda(0, \mathbf{h}) = \lambda(0, \mathbf{q}). \quad (80)$$

269 Unless the functional forms of  $\lambda$  and  $\mu$  have been specifically designed for this purpose, it is generally unlikely  
 270 that Eq. (80) will be satisfied for some  $\mathbf{h} \neq \mathbf{q}$ .

271 A stronger argument for the low probability of congruence ridges can be made as follows. Suppose that  $\mathbf{q}$   
 272 was part of a congruence ridge, i.e. a sub-manifold in parameter space belonging to the same congruence  
 273 class. Then there must exist a curve in parameter space, i.e. a one-parameter function  $\mathbf{h} : [-\varepsilon, \varepsilon] \rightarrow \mathbb{R}^n$ ,  
 274 passing through  $\mathbf{q}$  (e.g., say  $\mathbf{h}(0) = \mathbf{q}$ ), such that:

$$r_p(\tau, \mathbf{h}(s)) = r_p(\tau, \mathbf{q}), \quad (81)$$

275 and such that:

$$\lambda(0, \mathbf{h}(s)) = \lambda(0, \mathbf{q}), \quad (82)$$

276 for all  $s \in [-\varepsilon, \varepsilon]$  and all  $\tau \geq 0$ . Taking the derivative of Eq. (81) with respect to  $s$  at 0 yields:

$$\sum_{i=1}^n \frac{\partial r_p}{\partial q_i} \Big|_{(\tau, \mathbf{q})} \cdot \frac{dh_i}{ds} \Big|_{s=0} = 0. \quad (83)$$

277 Denote  $\mathbf{H} := \frac{d\mathbf{h}}{ds} \Big|_{s=0}$  and  $\mathbf{R}(\tau) := \frac{\partial r_p}{\partial \mathbf{q}} \Big|_{\tau, \mathbf{q}}$ . Then the condition in Eq. (83) can be written in vector notation:

$$\mathbf{R}(\tau)^T \cdot \mathbf{H} = 0. \quad (84)$$

278 Note that  $\mathbf{H}$  can be interpreted as the “velocity vector” along the ridge curve  $\mathbf{h}$  at the point  $\mathbf{q}$ , and hence con-  
 279 dition (84) means that the ridge must move perpendicular to the direction of steepest descent of  $r_p$ . Observe  
 280 that condition (84) must be satisfied for all ages  $\tau \geq 0$ . Hence, for any arbitrary choice  $\tau_1, \tau_2, \dots, \tau_m \geq 0$ , we  
 281 obtain the following  $m$  linear equations that must be satisfied by  $\mathbf{H}$ :

$$\begin{aligned} \mathbf{R}(\tau_1)^T \cdot \mathbf{H} &= 0. \\ &\vdots \\ \mathbf{R}(\tau_m)^T \cdot \mathbf{H} &= 0. \end{aligned} \quad (85)$$

282 Unless the functional forms of  $\lambda$  and  $\mu$  are specifically designed for this purpose, the system in Eq. (85)  
 283 will almost certainly be over-determined if  $m$  is chosen sufficiently high ( $m \gg n$ ). Hence, in practice, for a  
 284 chosen set of allowed models and a given point  $\mathbf{q}$  in parameter space, a congruence ridge will almost never  
 285 exist at that point.

286 □

## 287 **S.4 Interpreting the PDR**

288 Given that the PDR is a composite quantity that depends on both  $\lambda$  and  $\mu$  (Eq. 1), properly interpreting the  
289 estimated PDR in terms of actual speciation/extinction rates remains the responsibility of the investigator.  
290 Previous work has shown that the PDR can indeed yield valuable insight into diversification dynamics and  
291 can be useful for testing alternative hypotheses (6). For example, sudden rate transitions (e.g., due to mass  
292 extinction events) almost always lead to fluctuations in the PDR; thus, a relatively constant PDR over time  
293 would be indicative of constant — or only slowly changing — speciation and extinction rates.

294 The PDR can be used to obtain other useful variables. For example, it is straightforward to confirm that the  
295 PDR and the total diversity  $N$  satisfy the following relationship:

$$\frac{N(\tau)}{N(0)} \cdot \frac{\lambda_o}{\lambda(\tau)} = \exp \left[ - \int_0^\tau du r_p(u) \right]. \quad (86)$$

296 Observe that the left hand side of this equation, henceforth called deterministic “pulled normalized diversity”  
297 (dPND), corresponds to the ratio of deterministic total diversity at some age  $\tau$  over the assumed present-day  
298 total diversity  $N(0)$ , modulated by the factor  $\lambda_o/\lambda(\tau)$ . Like the PDR, the dPND is the same for all models in  
299 a congruence class, and can be readily estimated from extant timetrees (Fig. S4C). As becomes apparent from  
300 Eq. (86), while the dPND can yield information on variations of past diversity, the amount of information  
301 depends on how well  $\lambda$  can be constrained a priori.

302 Another useful derived variable is the “pulled extinction rate”, or PER (6), defined as:

$$\mu_p := \lambda_o - r_p. \quad (87)$$

303 The PER is equal to the extinction rate  $\mu$  if  $\lambda$  is time-independent, but differs from  $\mu$  in most other cases.  
304 Note that calculating the PER requires knowing the present-day speciation rate  $\lambda_o$ , which can be estimated  
305 from the timetree if the sampling fraction  $\rho$  is known (simply divide the estimated  $\rho\lambda_o$  by  $\rho$ ). The present-day  
306 PER is related to the present-day extinction rate as follows:

$$\mu_p(0) = \mu(0) - \frac{1}{\lambda_o} \frac{d\lambda}{d\tau} \Big|_{\tau=0}. \quad (88)$$

307 Observe that if the present-day speciation rate changes only slowly, the present-day PER will resemble the  
308 present-day extinction rate. Further, since  $\mu(0)$  is non-negative, we can obtain the following lower bound for  
309 the exponential rate at which  $\lambda$  changes:

$$\frac{1}{\lambda_o} \frac{d\lambda}{d\tau} \Big|_{\tau=0} \geq -\mu_p(0). \quad (89)$$

310 In particular, if the estimated  $\mu_p(0)$  is negative, this is evidence that  $\lambda$  is currently decreasing over time.

## 311 **S.5 Fitting congruence classes instead of models**

312 The discussion in the main article revealed that speciation and extinction rates constitute partly interchange-  
313 able (and thus partly redundant) parameters that cannot be completely resolved from extant timetrees alone,  
314 no matter how large the dataset. Extant timetrees do, however, contain the proper information to estimate  
315 the pulled diversification rate  $r_p$  and  $\eta_o$  (recall that  $\eta_o = \rho\lambda_o$ ), and may thus be used to at least identify the

316 congruence class from which a tree was likely generated. In fact, for sufficiently large trees  $r_p$  and  $\eta_o$  can  
317 be directly calculated from the slope and curvature of the tree's LTT (6). Since each congruence class cor-  
318 responds to a unique  $r_p$  and  $\eta_o$ , the  $r_p$  and  $\eta_o$  can be used to parameterize the space of congruence classes;  
319 on this space the likelihood function no longer exhibits the highly problematic ridges seen in the original  
320 model space. We thus suggest describing birth-death models in terms of  $r_p$  and  $\eta_o$ , rather than  $\lambda$  and  $\mu$ ,  
321 when fitting models to timetrees. Since the likelihood function can be expressed directly in terms of  $r_p$  and  
322  $\eta_o$  (Supplement S.1.6), such a parameterization is suitable for maximum-likelihood or Bayesian estimation  
323 methods. Reciprocally, since every given  $r_p$  and  $\eta_o$  correspond to a unique and non-empty congruence class  
324 (as shown in the main article), any  $r_p$  and  $\eta_o$  estimated from an extant timetree will represent at least one  
325 biologically meaningful scenario. It is thus possible to directly fit congruence classes, rather than individual  
326 models, via maximum-likelihood. A similar reasoning can also be applied to the pulled speciation rate  $\lambda_p$ ,  
327 which provides an alternative representation of congruence classes.

328 To demonstrate this approach, we created software for fitting  $r_p$  and  $\eta_o$  to extant timetrees via maximum  
329 likelihood. The code is integrated into the R package *castor* (25) as function `fit_hbd_pdr_on_grid`. The  
330 function accepts as input an extant timetree, and an arbitrary number of discrete ages at which to estimate  $r_p$ ,  
331 assuming  $r_p$  varies linearly or polynomially between those ages. The function also accepts optional lower  
332 and upper bounds for the fitted  $r_p$  and/or  $\eta_o$ . The code then maximizes the likelihood of the tree, given by  
333 Eq. (56) in the Supplement, by iteratively refining the  $r_p$  values on the age grid and/or  $\eta_o$ . Optionally, one  
334 can limit the evaluation of the likelihood function to a smaller “truncated” age interval than covered by the  
335 tree, i.e. some age interval  $[0, \tau^*]$ , where  $\tau^*$  may be smaller than the root age. This may be useful for avoid  
336 estimation errors towards older ages due to a small number of lineages in the tree. The likelihood formula  
337 for the “truncated” case can be easily obtained by assuming that the tree is split into multiple sub-trees, each  
338 originating at the truncation age, and considering each sub-tree an independent realization of the same birth-  
339 death process and subject to the same sampling fraction  $\rho$ . To avoid non-global local optima, the fitting can  
340 be repeated multiple times, each time starting at random start values for the fitted parameters, and the best  
341 fit among all repeats is kept. We also developed similar computer code for fitting the pulled speciation rate  
342  $\lambda_p$  to extant timetrees, implemented as function `fit_hbd_psr_on_grid` in the R package *castor*.

343 Supplemental Fig. S4 shows an example where either the  $r_p$  or  $\lambda_p$  were accurately fitted to an extant timetree,  
344 simulated under a birth-death scenario subject to an early rapid radiation event and followed by a mass  
345 extinction event. In this example, we limited fitting to ages where the LTT was over 500 lineages (i.e.,  
346  $M(\tau^*) = 500$ ), and repeated the fitting 100 times to avoid non-global local optima.

## 347 **S.6 Fitting birth-death models to trees yields unreliable results**

348 To illustrate the identifiability issues discussed in the main article, we simulated and analyzed two massive  
349 extant timetrees ( $\sim 114,000$  and  $\sim 785,000$  tips) via a birth-death process, subject to a mass extinction event  
350 (both trees) and a rapid radiation event (second tree). Instead of fitting models of the exact same functional  
351 form as used in the simulations, we fitted generic piecewise-linear curves for  $\lambda$  and  $\mu$  that could in principle  
352 take various alternative shapes (including approximately the shapes used for the simulations), and visually  
353 compared the estimated profiles to their true profiles (Supplemental Figs. S5A–F). Specifically, we fitted  $\lambda$   
354 and  $\mu$  at multiple discrete time points, treating the rates at each time point as free parameters, while assuming  
355 a known  $\rho$ . Despite the enormous tree sizes, and despite the fact that the fitted models reproduced the trees'  
356 LTTs and the true  $r_p$  extremely well (Supplemental Figs. S5A,C,D,F), the estimated  $\lambda$  and  $\mu$  were far from  
357 their true values and even exhibited spurious trends (Supplemental Figs. S5BE). This is consistent with our  
358 expectation that the particular combination of fitted  $\lambda$  and  $\mu$  is essentially a random pick from the periphery

359 of the true process's congruence class. In contrast, when we fixed  $\mu$  to its true profile,  $\lambda$  was accurately  
360 estimated (Supplemental Fig. S2), consistent with the expectation that any given  $\mu$  and  $\rho$  fully determine the  
361 corresponding  $\lambda$  in the congruence class.

362 We also examined a large extant timetree of 79,874 seed plant species (Supplemental Fig. S3) published  
363 by Smith *et al.* (26), and estimated  $\lambda$  and  $\mu$  over the last 100 million years using two alternative approaches  
364 (methods details in Supplement S.7). In the first approach, we fitted generic piecewise-linear curves for  $\lambda$   
365 and  $\mu$ , similarly to the previous example. In the second approach, we fitted parameterized time curves for  $\lambda$   
366 and  $\mu$  that included an exponential as well as a polynomial term (5). Even though both approaches yielded  
367 similar estimates for  $r_p$ , and both accurately reproduced the tree's LTT, they yielded markedly different  $\lambda$   
368 and  $\mu$  (Supplemental Figs. S5D–F). This observation is consistent with our argument that, depending on the  
369 precise set of models considered, the estimated  $\lambda$  and  $\mu$  will generally be a random pick from the underlying  
370 (true or close-to-true) congruence class.

371 To illustrate our point that common model selection approaches such as minimizing the Akaike Information  
372 Criterion (AIC) (27) cannot resolve the identifiability issues discussed, we also fitted a series of models of  
373 variable complexity to a massive timetree of 1,000,000 tips. The tree was simulated based on origination and  
374 extinction rates of marine invertebrate genera, previously estimated from marine invertebrate fossil data (28)  
375 (Fig. 2D in the main article). We fitted two types of models: piecewise constant models and piecewise linear  
376 models. In piecewise constant models (sometimes also referred to as “birth-death-shift” models; 13) the rates  
377  $\lambda$  and  $\mu$  have constant values within discrete time intervals, with every time interval exhibiting distinct  $\lambda$  and  
378  $\mu$ . In piecewise linear models  $\lambda$  and  $\mu$  vary linearly between discrete time points. For both model types we  
379 considered various temporal grid sizes, ranging from 5 up to 15 grid points, thus including sufficient model  
380 complexity for approximating the true rates. In all cases the time grid points were located at equidistant  
381 intervals between the present and the tree's root. For each model type (piecewise constant or piecewise  
382 linear) and for each grid size we estimated the free parameters (either the rates within each interval, or the  
383 rates at each grid point, respectively) via maximum likelihood using the function `fit_hbd_model_on_grid`  
384 in the R package `castor`. Only the most recent 100 million years were considered for fitting, in order to focus  
385 estimations on times with greater lineage density in the simulated tree (towards the root estimated rates will be  
386 inaccurate regardless of the arguments presented in this paper). Fitting was repeated 20 times with random  
387 start parameters to avoid local non-global optima. Among each model type, we then kept the maximum  
388 likelihood model with smallest AIC value, shown in Supplemental Fig. S6. As expected, estimated rates  
389 were highly inaccurate and missed important features, despite the fact that we were using a massive tree of  
390 1,000,000 tips, and the fact that the tree's LTT was almost perfectly matched by the models' dLTTs.

## 391 **S.7 Fitting birth-death models to seed plants**

392 An extant timetree of 79,874 seed plant species, constructed using GenBank sequence data with a backbone  
393 provided by Magallón *et al.* (29), was obtained from the Supplemental Material published by Smith *et al.* (26,  
394 tree “CBMB”). The tree is shown in Supplemental Fig. S3. The sampling fraction was calculated based on  
395 the tree size and the number of extant seed plant species estimated at 422,127 by Govaerts (30). As mentioned  
396 in Supplement S.6, two approaches were used to fit  $\lambda$  and  $\mu$  over time. In the first approach,  $\lambda$  and  $\mu$  were  
397 allowed to vary independently at 8 discrete and equidistant time points (assuming piecewise linearity between  
398 grid points) and were estimated via maximum-likelihood using the function `fit_hb_model_on_grid` in the  
399 R package `castor` (25) (options “`condition='stem'`”, “`relative_dt=0.001`”). Fitting was repeated 100  
400 times using random start parameters to avoid local non-global optima in the likelihood function. The PDR  
401 was then estimated from the fitted  $\lambda$  and  $\mu$  using the formula in Eq. (1) and using central finite differences to



402 calculate derivatives on the time grid. In the second approach,  $\lambda$  and  $\mu$  were assumed to be of the following  
403 general functional forms:

$$\lambda(\tau) = \max \left( 0, p_1 \cdot e^{-p_2 \cdot \tau / \tau_r} + p_3 + p_4 \cdot \frac{\tau}{\tau_r} + p_5 \cdot \left( \frac{\tau}{\tau_r} \right)^2 + p_6 \cdot \left( \frac{\tau}{\tau_r} \right)^3 + p_7 \cdot \left( \frac{\tau}{\tau_r} \right)^4 \right) \quad (90)$$

404

$$\mu(\tau) = \max \left( 0, q_1 \cdot e^{-q_2 \cdot \tau / \tau_r} + q_3 + q_4 \cdot \frac{\tau}{\tau_r} + q_5 \cdot \left( \frac{\tau}{\tau_r} \right)^2 + q_6 \cdot \left( \frac{\tau}{\tau_r} \right)^3 + q_7 \cdot \left( \frac{\tau}{\tau_r} \right)^4 \right), \quad (91)$$

405 where  $\tau_r$  is the age of the root and  $p_1, \dots, p_7, q_1, \dots, q_7$  are fitted parameters. Parameters were fitted using the  
406 `castor` function `fit_hbd_model_parametric` (options “`condition='stem'`, `relative_dt=0.001`,  
407 `param_min=-100`, `param_max=100`”). As in the first approach, fitting was repeated 100 times to avoid  
408 local non-global optima. In both approaches, the likelihood only incorporated branching events at ages  
409 between 0 and 130 Myr, since the LTT and any parameter estimates become much less reliable at older ages.

## 410 S.8 Supplemental figures

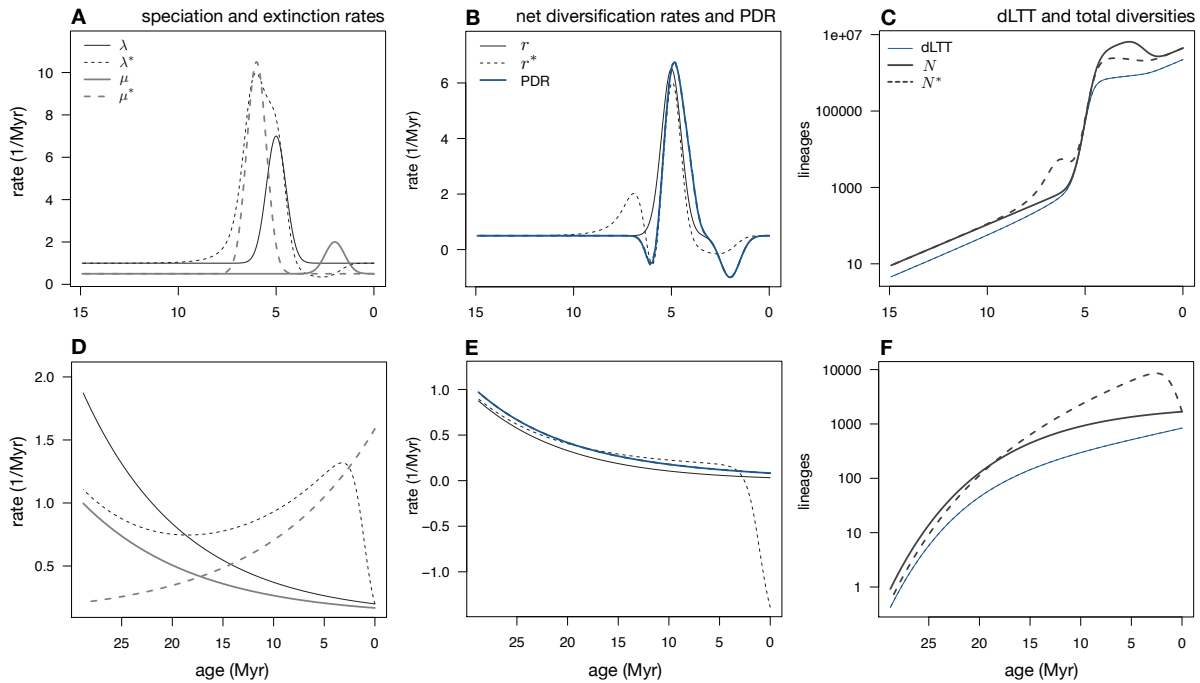

**Figure S1: Examples of congruent birth-death processes.** (A–C) Example of two congruent yet markedly different birth-death models. Both models exhibit a temporary spike in the extinction rate and a temporary spike in the speciation rate, however the timings of these events differ substantially between the two models. Both models exhibit the same dLTT and the same pulled diversification rate  $r_p$ , and would yield identical likelihoods for any given extant timetree. (A) Speciation rates ( $\lambda$  and  $\lambda^*$ ) and extinction rates ( $\mu$  and  $\mu^*$ ) of the two models, plotted over time. Continuous curves correspond to the first model, dashed curves to the second model. (B) Net diversification rates ( $r$  and  $r^*$ ) and pulled diversification rate  $r_p$  of the two models. (C) Deterministic LTT (dLTT) and deterministic total diversities ( $N$  and  $N^*$ ) predicted by the two models. (D–F) Another example of two congruent models. In the first model, the speciation and extinction rates both decrease exponentially over time, whereas in the second model the extinction rate increases exponentially over time and the speciation rate exhibits variable directions of change over time. In all models the sampling fraction is  $\rho = 0.5$ .

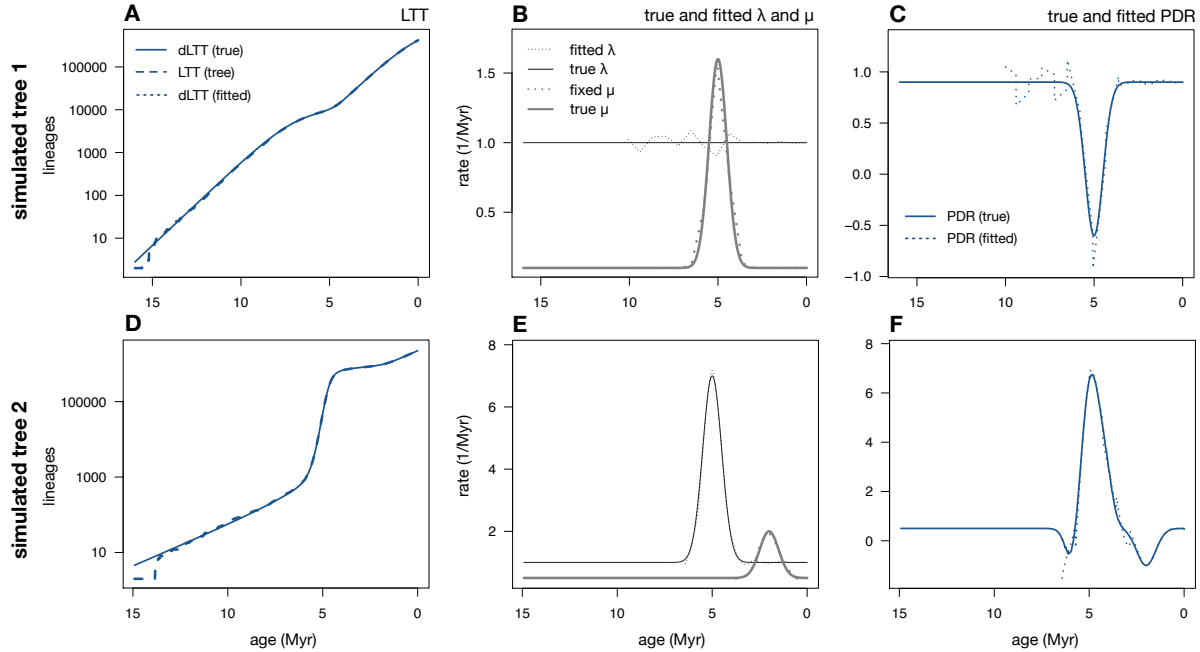

**Figure S2: Estimating  $\lambda$  when  $\mu$  and  $\rho$  are fixed.** (A–C) Example analysis of a simulated extant timetree ( $\sim 114,000$  tips), exhibiting a mass extinction event at  $\sim 5$  Myr before present. A birth-death model was fitted while fixing  $\mu$  and  $\rho$  to their true values;  $\lambda$  was fitted at 15 discrete time points. (A) Lineages through time curve (LTT) of the generated tree (long-dashed curve), deterministic LTT (dLTT) of the true model that generated the tree (continuous curve), and dLTT of a maximum-likelihood fitted model (short-dashed curve). The fitted dLTT is practically identical to the true dLTT and is thus covered by the latter. (B) True speciation and extinction rates (continuous curves), along with the fitted speciation rate and fixed extinction rate (dashed curves). (C) Pulled diversification rate (PDR) of the true model ( $r_p$ , continuous curve), compared to the PDR of the fitted model (dashed curve). (D–F) Example analysis of a simulated extant timetree ( $\sim 785,000$  tips), exhibiting a rapid radiation event at  $\sim 5$  Myr before present and a mass extinction event at  $\sim 2$  Myr before present. A birth-death model was fitted similarly to the previous example, and D–F are analogous to A–C. In both cases, rate estimation was restricted to ages where the LTT included at least 500 lineages.

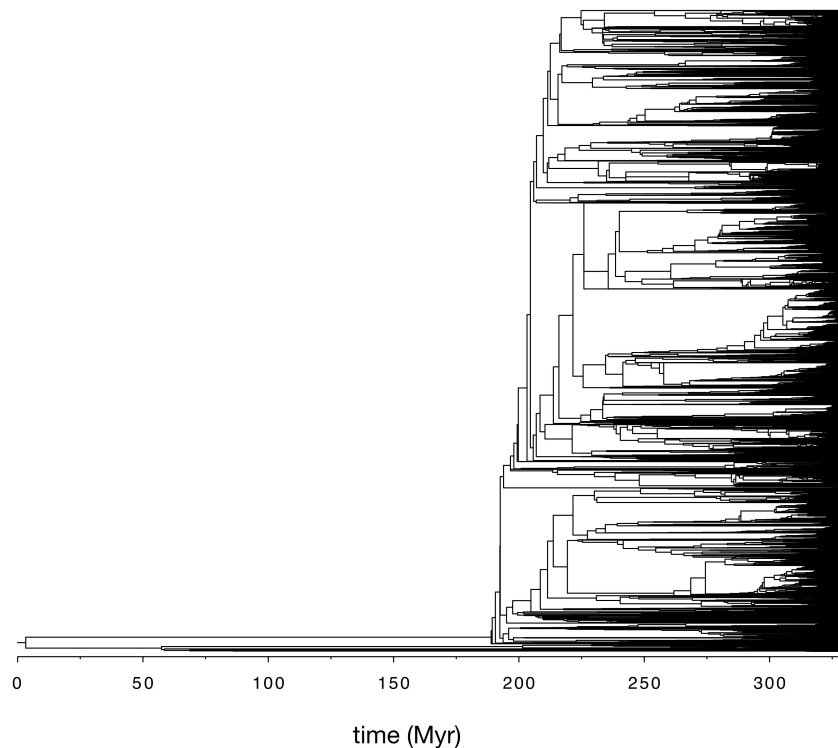

**Figure S3: Seed plant tree.** Extant timetree of 79,874 seed plant species, discussed in the main article. The tree was constructed and made available by Smith *et al.* (26) (tree “GBMB”).

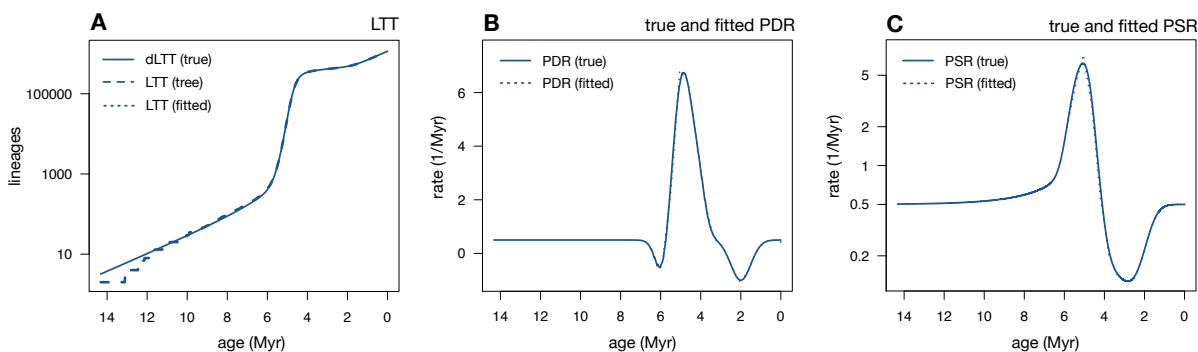

**Figure S4: Fitting congruence classes instead of models.** Analysis of an extant timetree generated by a birth-death model, exhibiting a temporary rapid radiation event about 5 Myr before present and a mass extinction event about 2 Myr before present. A congruence class was fitted to the timetree either in terms of the pulled diversification rate (PDR,  $r_p$ ) and the product  $\rho\lambda_o$ , or in terms of the pulled speciation rate (PSR,  $\lambda_p$ ). (A) Lineages through time curve (LTT) of the tree (long-dashed curve), together with the deterministic LTT (dLTT) of the true model (continuous curve) and the dLTT of the fitted congruence classes (short-dashed curve); in both cases the fitted dLTT was virtually identical to the true dLTT, and is thus completely covered by the latter. (B) PDR of the true model (continuous curve), compared to the fitted PDR (short-dashed curve). (C) PSR of the true model (continuous curve), compared to the fitted PSR (short-dashed curve). The PDR and PSR were fitted via maximum-likelihood using the R package *castor* (25), allowing the PDR or PSR to vary freely at 15 discrete equidistant time points (Supplement S.5).

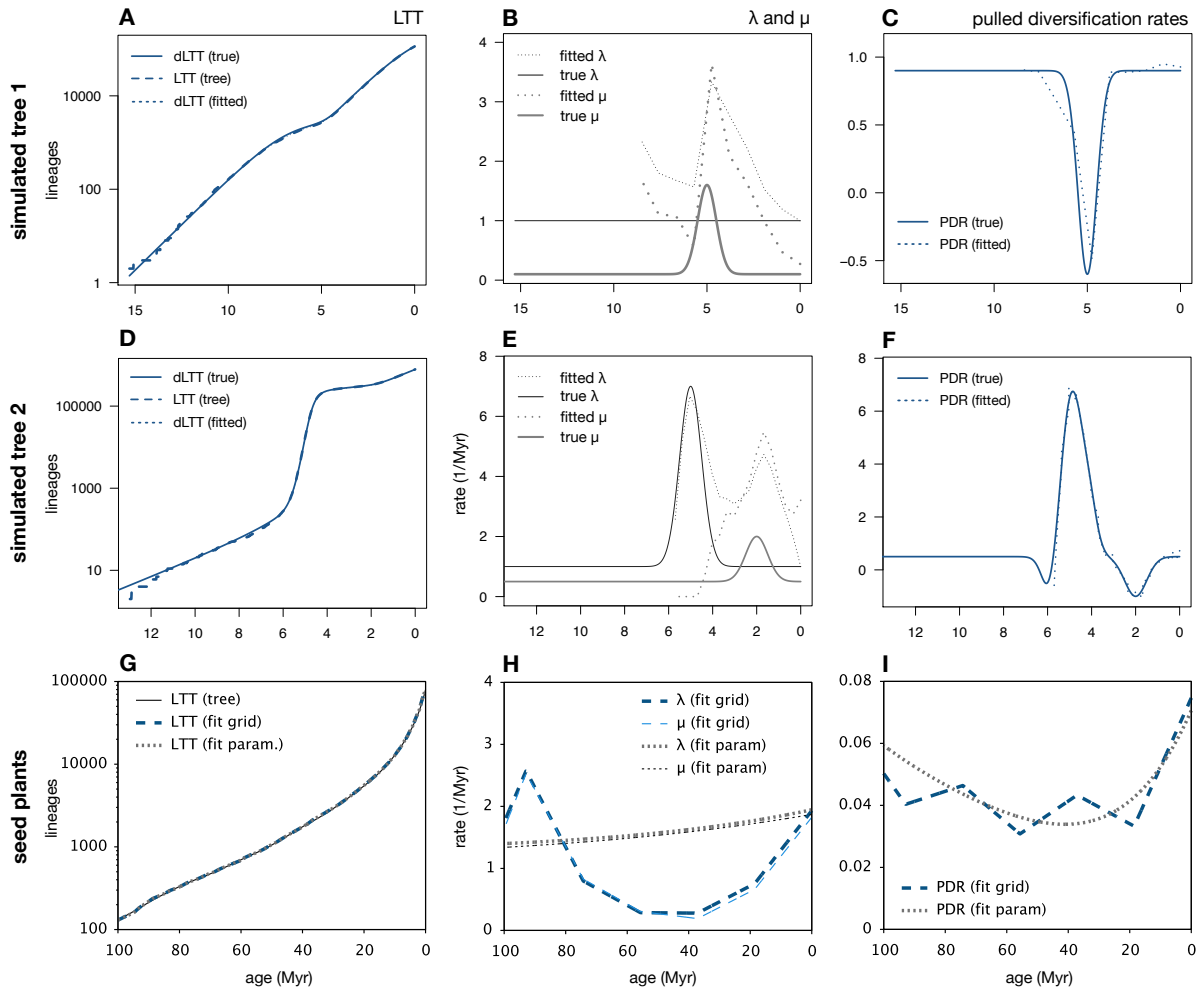

**Figure S5: Identifiability issues persist in large trees.** (A–C) Diversification analysis of a timetree (~114,000 tips) simulated from a birth-death process exhibiting a mass extinction event at ~5 Myr before present. (A) Lineages through time curve (LTT) of the generated tree (long-dashed curve), deterministic LTT (dLTT) of the true model that generated the tree (continuous curve), and dLTT of a maximum-likelihood fitted model (short-dashed curve). The fitted dLTT is practically identical to the true dLTT and is thus covered by the latter. (B) True speciation and extinction rates (continuous curves), compared to fitted speciation and extinction rates (dashed curves). Observe the great disagreement between the fitted and true  $\lambda$  and  $\mu$ , despite the fact that the allowed model set could in principle approximate the true rates reasonably well. (C) Pulled diversification rate (PDR) of the true model (continuous curve), compared to the PDR of the fitted model (dashed curve). (D–F) Diversification analysis of a timetree (~785,000 tips) simulated from a birth-death process exhibiting a rapid radiation event at ~5 Myr before present and a mass extinction event at ~2 Myr before present. Sub-figures D–F are analogous to A–C. Again, observe the great disagreement between the fitted and true  $\lambda$  and  $\mu$ , despite the fact that the allowed model set could in principle approximate the true rates reasonably well. See Supplemental Fig. S2 for fitting results when  $\mu$  is fixed to its true value. (G–I) Diversification analyses of an extant timetree of 79,874 seed plant species (26), performed either by fitting  $\lambda$  and  $\mu$  on a grid of discrete time points or by fitting the parameters of generic polynomial/exponential functions for  $\lambda$  and  $\mu$ . (G) LTT of the tree, dLTT of the grid-fitted model and dLTT of the fitted parametric model. (H) Speciation and extinction rates predicted by the grid-fitted model or the fitted parametric model. (I) PDR predicted by the grid-fitted model and the fitted parametric model.

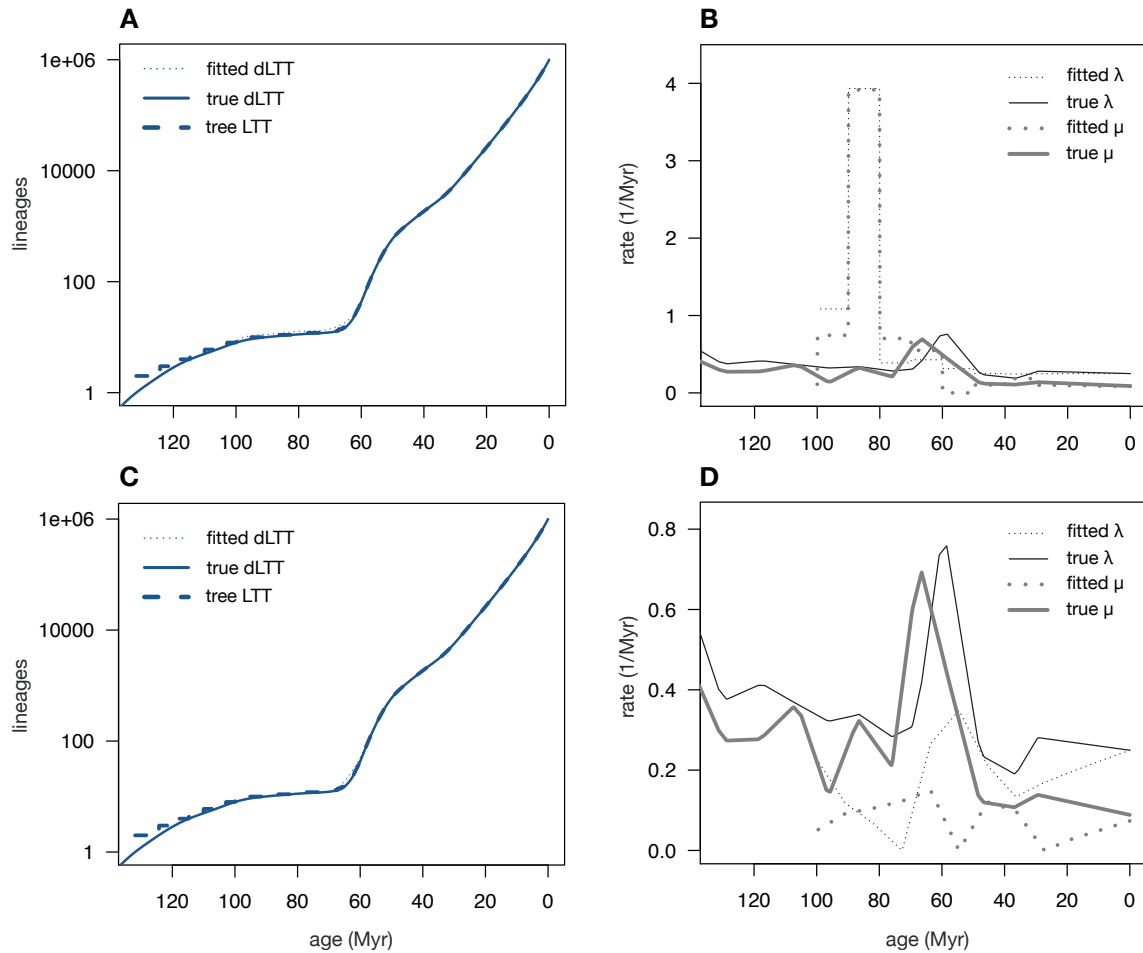

**Figure S6: Identifiability issues cannot be resolved with AIC.** Maximum-likelihood birth-death models fitted to a tree comprising 1,000,000 tips, simulated based on the origination and extinction rates of marine invertebrate genera estimated from fossil data (28). Top row: Maximum-likelihood-fitted piecewise constant model (also known as birth-death-shift model), with grid size ( $N = 11$ ) chosen by minimizing the AIC. Bottom row: Maximum-likelihood-fitted piecewise linear model, with grid size ( $N = 12$ ) chosen by minimizing the AIC. Left column: dLTTs of the fitted models compared to the true dLTT and the tree's LTT. Right column: Fitted speciation and extinction rates, compared to the true rates used to generate the tree. Observe that in both cases the maximum-likelihood models poorly reflect the true rates despite a near-perfect match of the LTT, even when the complexity of the models was optimized based on the AIC. For Methods details see Supplement S.6.

## References

- 411
- 412 [1] D. G. Kendall, On some modes of population growth leading to RA Fisher's logarithmic series distri-  
413 bution. *Biometrika* **35**, 6–15 (1948).
- 414 [2] P. H. Harvey, R. M. May, S. Nee, Phylogenies without fossils. *Evolution* **48**, 523–529 (1994).
- 415 [3] S. Nee, R. M. May, P. H. Harvey, The reconstructed evolutionary process. *Philosophical Transactions*  
416 *of the Royal Society of London B: Biological Sciences* **344**, 305–311 (1994).
- 417 [4] T. Kubo, Y. Iwasa, Inferring the rates of branching and extinction from molecular phylogenies. *Evolution*  
418 **49**, 694–704 (1995).
- 419 [5] H. Morlon, T. L. Parsons, J. B. Plotkin, Reconciling molecular phylogenies with the fossil record. *Pro-*  
420 *ceedings of the National Academy of Sciences* **108**, 16327–16332 (2011).
- 421 [6] S. Louca, *et al.*, Bacterial diversification through geological time. *Nature Ecology & Evolution* **2**, 1458–  
422 1467 (2018).
- 423 [7] D. G. Kendall, *et al.*, On the generalized “birth-and-death” process. *The annals of mathematical statis-*  
424 *tics* **19**, 1–15 (1948).
- 425 [8] V. Climenhaga, A. Katok, *From Groups to Geometry and Back*, Student Mathematical Library (Amer-  
426 ican Mathematical Society, Providence, Rhode Island, USA, 2017).
- 427 [9] D. L. Rabosky, Likelihood methods for detecting temporal shifts in diversification rates. *Evolution* **60**,  
428 1152–1164 (2006).
- 429 [10] D. L. Rabosky, Laser: a maximum likelihood toolkit for detecting temporal shifts in diversification  
430 rates from molecular phylogenies. *Evolutionary Bioinformatics* **2** (2006).
- 431 [11] D. L. Rabosky, I. J. Lovette, Explosive evolutionary radiations: decreasing speciation or increasing  
432 extinction through time? *Evolution: International Journal of Organic Evolution* **62**, 1866–1875 (2008).
- 433 [12] D. Silvestro, J. Schnitzler, G. Zizka, A bayesian framework to estimate diversification rates and their  
434 variation through time and space. *BMC Evolutionary Biology* **11**, 311 (2011).
- 435 [13] T. Stadler, Mammalian phylogeny reveals recent diversification rate shifts. *Proceedings of the National*  
436 *Academy of Sciences* **108**, 6187–6192 (2011).
- 437 [14] H. Morlon, Phylogenetic approaches for studying diversification. *Ecology Letters* **17**, 508–525 (2014).
- 438 [15] M. A. McPeck, The ecological dynamics of clade diversification and community assembly. *The Amer-*  
439 *ican Naturalist* **172**, E270–E284 (2008).
- 440 [16] P. J. Mayhew, G. B. Jenkins, T. G. Benton, A long-term association between global temperature and bio-  
441 diversity, origination and extinction in the fossil record. *Proceedings of the Royal Society B: Biological*  
442 *Sciences* **275**, 47–53 (2008).
- 443 [17] J. A. Esselstyn, R. M. Timm, R. M. Brown, Do geological or climatic processes drive speciation in  
444 dynamic archipelagos? the tempo and mode of diversification in southeast asian shrews. *Evolution* **63**,  
445 2595–2610 (2009).

- 446 [18] A. N. Egan, K. A. Crandall, Divergence and diversification in North American Psoraleeae (Fabaceae)  
447 due to climate change. *BMC Biology* **6**, 55 (2008).
- 448 [19] J. L. Cantalapiedra, *et al.*, Dietary innovations spurred the diversification of ruminants during the  
449 Caenozoic. *Proceedings of the Royal Society B: Biological Sciences* **281**, 20132746 (2014).
- 450 [20] F. L. Condamine, J. Rolland, H. Morlon, Macroevolutionary perspectives to environmental change.  
451 *Ecology Letters* **16**, 72–85 (2013).
- 452 [21] T. Stadler, On incomplete sampling under birth–death models and connections to the sampling-based  
453 coalescent. *Journal of Theoretical Biology* **261**, 58–66 (2009).
- 454 [22] H. Morlon, M. D. Potts, J. B. Plotkin, Inferring the dynamics of diversification: A coalescent approach.  
455 *PLOS Biology* **8**, e1000493 (2010).
- 456 [23] T. Stadler, How can we improve accuracy of macroevolutionary rate estimates? *Systematic Biology* **62**,  
457 321–329 (2013).
- 458 [24] T. Stadler, M. Steel, Swapping birth and death: Symmetries and transformations in phylodynamic mod-  
459 els. *Systematic Biology* **68**, 852–858 (2019).
- 460 [25] S. Louca, M. Doebeli, Efficient comparative phylogenetics on large trees. *Bioinformatics* **34**, 1053–  
461 1055 (2017).
- 462 [26] S. A. Smith, J. W. Brown, Constructing a broadly inclusive seed plant phylogeny. *American Journal of*  
463 *Botany* **105**, 302–314 (2018).
- 464 [27] H. Akaike, Likelihood of a model and information criteria. *Journal of Econometrics* **16**, 3–14 (1981).
- 465 [28] J. Alroy, Dynamics of origination and extinction in the marine fossil record. *Proceedings of the National*  
466 *Academy of Sciences* **105**, 11536–11542 (2008).
- 467 [29] S. Magallón, S. Gómez-Acevedo, L. L. Sánchez-Reyes, T. Hernández-Hernández, A metacalibrated  
468 time-tree documents the early rise of flowering plant phylogenetic diversity. *New Phytologist* **207**, 437–  
469 453 (2015).
- 470 [30] R. Govaerts, How many species of seed plants are there? *Taxon* **50**, 1085–1090 (2001).
